# Supplementary material
Source: publisher figshare collection journal article supplement (https://microbiology.figshare.com/articles/dataset/_/24523900)
Supplement: Supplementary file 1 [file 1]

# **Identification of novel tail-anchored membrane proteins integrated by the bacterial twin-arginine translocase**

José Jesús Gallego-Parrilla<sup>1\*</sup>, Emmanuele Severi<sup>1\*</sup>, Govind Chandra<sup>2</sup> and Tracy Palmer<sup>1</sup>

<sup>1</sup> Microbes in Health and Disease Theme, Newcastle University Biosciences Institute, Newcastle University, Newcastle upon Tyne, NE2 4HH, UK.

<sup>2</sup> John Innes Centre, Norwich Research Park, Norwich NR4 7UH, UK.

\* These authors contributed equally to this study.

## **SUPPLEMENTARY INFORMATION**

**Fig S1.** A. Multiple sequence alignment of seven S1 peptidase sequences from *Streptomyces*. The red box indicates the likely signal peptide region (predicted using SignalP-6.0) and the yellow the C-tail region (identified from DeepTMHMM). B. AlphaFold structure prediction for Uniprot entry D9XEL1, an S1-peptidase from *Streptomyces viridochromogenes*, coloured according to confidence (from dark blue which is very high through to red which is very low).

**Fig S2.** Multiple sequence alignment of six streptomycete D-alanyl-D-alanine carboxypeptidases from dataset S1 alongside *S. coelicolor* DacC (CAB9066.1). The twin arginines of the signal peptide are indicated in red. The C-tail regions of each protein (identified from DeepTMHMM) are shown in yellow.

**Fig S3.** A. Multiple sequence alignment of seven LPXTG/LAETG-motif containing peptidase sequences from *Streptomyces*. The red box indicates the likely signal peptide region (predicted using SignalP-6.0) and the yellow the C-tail region (identified from DeepTMHMM). The asterisks indicate the position of the sortase recognition motif.

**Fig S4.** A. Multiple sequence alignment of SCO1860 family LAETG-anchored proteins identified in dataset S2. The twin arginines of the signal peptide are indicated in red. peptidase sequences from *Streptomyces*. The yellow box indicates the C-tail region (identified from DeepTMHMM). The asterisks indicate the position of the sortase recognition motif.

**Fig S5.** No detectable export of AmiA by signal peptides of candidates 3, 5, 7, 8, 9, 14 and 16. Plasmids encoding the indicated signal peptide (SP) - AmiA fusions were introduced into *E. coli* strains MC4100  $\Delta amiA \Delta amiC$  (circles) and MC4100  $\Delta amiA \Delta amiC \Delta tatABC$  (triangles and labelled tat-) and grown for 20 h in LB in the presence of 0.5% SDS without shaking in a plate reader. Growth curves correspond to an averaged triplicate set  $\pm$  one SD (standard deviation). For clarity, growth curves are displayed either in groups of 2 or individually

alongside the positive ("SP\_TorA") and negative ("Vector", i.e., pUniAmiA) controls in each plot.

WP\_043259400.1 1 MRHARRRVRRVTRLTAAGVGLLGGAMVTOAAM SDTPARDAATLSAPQTPADKGSALVAKLSARTAGSWVDSGGRTVV  
 WP\_006380203.1 1 MRHARRRIVRRATRLTAAGCVILGGIMVTOAVA -EPPE-VNLPFSSAQAAAGTTGSELVTELGTDRTAGSWIAADGKFPVV  
 WP\_043435093.1 1 MRHARRRVRRRLTRLTAAGVGLLGGCTMVARAAV SEPPPASAR---SLSSAGNTCAAWVARLGRTARTAGTWIGSDGREVV  
 WP\_016325237.1 1 MRHARRRIVRRVARLTAAGVGLLGGCTMVTRAVA -EPPDASAAPRTFQAQTPSGAGDLVSRLLGTGRTAGHWVDSEGREVV  
 WP\_079047754.1 1 MRHARRRVRRVTRLTAAGVGLLGGAMVTRAVA -EPPADFPVYAAAEEDTGPGSALVARLGASRTAGSWLGEDGRTVV  
 WP\_086565138.1 1 MRHARRRVRRVTRLTAAGVGLLGGAMVTRAVA -ESPDPISIGVPYSARPATSMGTDLVSRLLGTSRTAGSWVDSAGREVV  
 WP\_086855524.1 1 MRHARRRVRRVTRLTAAGVGLLGGAMVTRAVA -EPPDPTIGVPYSAQPATSMGTDLVSRLLGTSRTAGSWVDSAGREVV

WP\_043259400.1 81 AVTDKATAAEVTKAGAEAKVVPYSNQLKSAATTTSSAPKIAGTAWAMDYRNKVLVEGDSSVSATSWAAMTKVAKSTGA  
 WP\_006380203.1 79 AVTDAEAATEVEKAGARAKIVDHSMNDLKSATKTTLSAPRVAGTAWAVDYTKNEVVQADSTVSAADWAKLSAVAKSIGG  
 WP\_043435093.1 78 AVTDDAAARAVRRTCAGAKIVRNSMNDLTSATATLRAAPRVAGTAWAVDYRTNTVKVQADRTVSAANWSRISQVAKKIGG  
 WP\_016325237.1 80 AVTDERAAEAARRAGATAKVRHSMSELRSAASTLSAPRVAGTAWALDYRSNEVVVRGDRTVSGSDWSRLTAVAEIGIG  
 WP\_079047754.1 80 AVTDEKAAAEVREACADPKVVRHSMRDILKSATKTLGSAAPRVPGTAWAMDYRSNEVVVRGDRTVSADWSRLTAVAEIGIG  
 WP\_086565138.1 80 AVTDEKAAAEVERAGARAKVVRHSMSDLKSATATLSAPRVPGTAWALDYKSNEVVVRGDRTVSADWSRLTAVAEIGIG  
 WP\_086855524.1 80 AVTDEKAAAEVERAGAOAKVVRHSMSDLKSATATLSAPRVPGTAWALDYKSNEVVVRGDRTVSADWSRLTAVAEIGIG

WP\_043259400.1 161 SVEMORTQCKETTRINCAQPIILSTGRCRSAGENVNTGQTDFFILTAGHCGPVGSIWFADNQDQQLGKTVSDNFPGSDFSL  
 WP\_006380203.1 159 SVRMERSEGTFTTRINAAQPIILSTGRCRSAGENVNTGSADEFFILTAGHCGPVGSIWFADTGSTETIKTISSEFPINDMSL  
 WP\_043435093.1 158 FVHMERTKCAFTTRINCAQPIILSTGRCRSAGENVNTGSTDFILTAGHCGPVGSTWFAADNQDQQLGKTVSNVFPFGHDFSL  
 WP\_016325237.1 160 FVRMERTEGAFTTRINCAEPILSTGRCRSAGENVNTDCTSDFFILTAGHCGPVGSIWFADNRPEQGVQRTVAGSFPFGDDFSL  
 WP\_079047754.1 160 AVTDEKAAAEVREACADPKVVRHSMRDILKSATKTLGSAAPRVPGTAWAMDYRSNEVVVRGDRTVSADWSRLTAVAEIGIG  
 WP\_086565138.1 160 FVRMERTEGTFTTRINCAQPIILSTGRCRSAGENVNTDCTTDYILTAGHCGPVGSIWFADNRKQVGSLLKGSFPFGDDMSL  
 WP\_086855524.1 160 FVRMERTEGTFTTRINCAEPILSTGRCRSAGENVNTDCKTDFILTAGHCGPVGSIWFADNRQVCTSLKGSFPFGDDMSL

WP\_043259400.1 241 VOYASGSAGGADVVAIGNCGSVTITGLADAAGVEKVRFSGSTSGLHDEGVTALDATVNYPEGTIVGLIETIVCAEPGDS  
 WP\_006380203.1 239 VOYNGGSAGGADVVAIGNCGSVRITGAADPTVGQKVRFSGSTTGLRDKVITGLNATVNYPEGTIVGLIETIVCAEPGDS  
 WP\_043435093.1 238 VOYSSGOAGGADVVAIGGCKGVRTITGAADPAVGQVRFSGSTSGLHDEGVTALNATVNYPEGTIVGLIETIVCAEPGDS  
 WP\_016325237.1 240 VEYANGKAGGADVVAIGGCKGVRTITGAGEPAVGQVRFSGSTSGLHDEGVTALDATVNYPEGTIVGLIETIVCAEPGDS  
 WP\_079047754.1 240 IEYDCGRAGEGAGVSVGNCGQIRITGVGDPVVGQVRFSGSTSGLHDEGVTALNATVNYPEGTIVGLIETIVCAEPGDS  
 WP\_086565138.1 240 VKYDSGRAGEGADVVAIGGCKGVRTITGVADAEGVQKIFRSGSTSGLHDEGVTALNATVNYPEGTIVGLIETIVCAEPGDS  
 WP\_086855524.1 240 VKYDSGRAGEGADVVAIGGCKGVRTITGVADAEGVQKIFRSGSTSGLHDEGVTALNATVNYPEGTIVGLIETIVCAEPGDS

WP\_043259400.1 321 GGPIFSEGIAGLGVTSGGSGDCT-AGGTTFFQELTKALAAALNVKLLVAPKTA-----ASAPASASAAGSAAAGTGSVTPGT  
 WP\_006380203.1 319 GGPIFSEGIAGLGVTSGGSGDCK-TGGTTFFQEPVTEALTALNVRLIGQAGQ-----AAPAPSG-AATQSAVAPGEAOPGS  
 WP\_043435093.1 318 GGPIFSEGIAGLGVTSGGSGDCT-TGGTTFFQEPVTKAMTALCVRLIVSAQNAAGGTQSGAPSPGPSTPPQRAIAPSAAAPGS  
 WP\_016325237.1 320 GGPIFSEGIAGLGVTSGGSGDCA-KGGTTFFQELPEAMASLCVRLIVPGREGAAAGTSAPAGQA-P---GTRAPGASGAGA  
 WP\_079047754.1 320 GGPIFSEGIAGLGVTSGGSGDCAQAGGTTFFQEPVTKALAAALNVKLLVAPKAGGGADTAAPASAST---GAATFDAASE--  
 WP\_086565138.1 320 GGPIFSEGIAGLGVTSGGSGDCT-AGGTTFFQEPVTKALTELGVKLLIVAKQAG-G-TGASAPAPASQ---GAASPGSSAP--  
 WP\_086855524.1 320 GGPIFSEGIAGLGVTSGGSGDCA-AGGTTFFQEPVTKALTELGVKLLIVAKQAG-GATGASAPASQ---GAASPGSSAP--

WP\_043259400.1 395 SAPATNTTAGTTTTASRLTPKIVGPGLLVIAAGSLIALVATRWIRA QDRKAFQRHYSAMWG  
 WP\_006380203.1 392 VAPVTGGSAG-EALLDKLADPKIVGPGLLIAGGSLIALVATRWFRV QDRRDYRRYSATWS  
 WP\_043435093.1 397 SAPVTGTAQG-GALLARLTDPKIVGPGLLVIAAGSLIALVATRYIRA QERRAYQQHYSATWG  
 WP\_016325237.1 395 PAPVAGV-DG-STLLARLTDPKIVGPGLLVVAGSLVALVATRWIRE QDRKAYRRRYSATWG  
 WP\_079047754.1 395 GSSAAGI-NA-STLLSRLADPRIVGPGLLVIAAGSLIALVATRWIRA QDRKAYQRYYSATWS  
 WP\_086565138.1 392 ---VTGE-DV-SGLLTRLTPKIVGPGLLVIAAGSLIALVATRWIRA QDRKAYRQHYSATWG  
 WP\_086855524.1 393 ---VTGE-DV-SGLLTRLTPKIVGPGLLVIAAGSLIALVATRWIRA QDRKAYRQYYSATWG

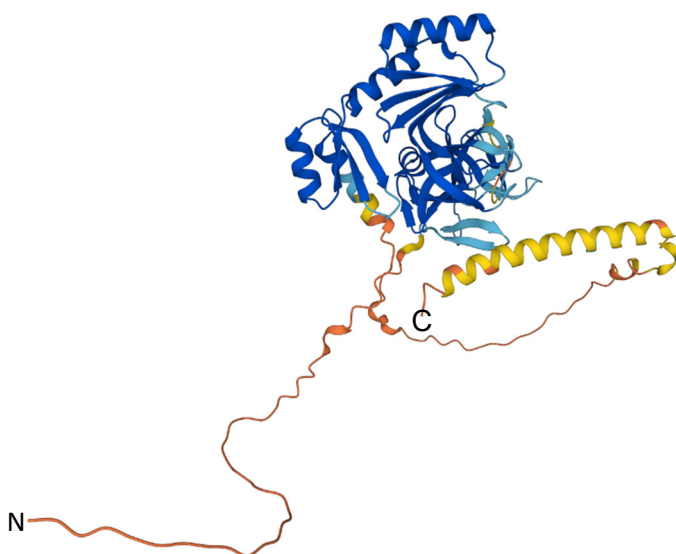

Fig S1



```

WP_086778847.1 1 MRITPSRRRTLGRSTAAVAATALVALG-AAPATADEPEPDLGVGTIAPIKGVQAGSAESTPLTELNKGTEEVVSYVTYA
WP_076967992.1 1 MGIAASCRRTLLSATAVSATAALIALG-AAPACAIAIKPDLGVRLAPVTGIAAGSGFGLPVSLLNKGTEELPKVWVSYT
WP_030568954.1 1 MGIAASCRRTLLSATAVSATAALIALG-AAPACAIAIKPDLGVRLAPVTGIAAGSGFGLPVSLLNKGTEELPKVWVSYT
WP_084749454.1 1 MGIIVSCRRTPLSGGAVLASAALIALATAPACAAGTGPDLGVGALTPTVTGIAFGGTGLPVSVLNKGTEEVKVVLSYS
WP_032758621.1 1 MGNVASCRRTLLSGTAVLAVALIALG-SAPACADETEPDLGVRLPTVTGIAFGSGFGLPVSLLNKGTEELPKAYVTYS
WP_031122887.1 1 MGNVASCRRTLLSGTAVLAVALIALG-SAPACADETEPDLGVRLPTVTGITFGSGFGLPVSLLNKGTEELPKAYVTYS
WP_055558699.1 1 MGNVASCRRTLLSGTAVLAVALIALG-SAPACADETEPDLGVRLPTVTGITFGSGFGLPVSLLNKGTEELPKAYVTYS

WP_086778847.1 80 VSPGLQADETYKNCSTYITPSHDEIPDEQVAACKIDQPLKPGVVYGTETKPLSLKALDLSALNDDLRTVTGVTEPDPSGDT
WP_076967992.1 80 YSSGIAPAETYSNCVYITLSPGGEWPEEHRACTVDQPLKPGVLYGTETQPIALATARANALYDEVGLGLLAEEPVEHP-DI
WP_030568954.1 80 YSSGIAPAETYSNCVYITLSPGGEWPEEHRACTVDQPLKPGVLYGTETQPIALATARANALYDEVGLGLLAEEPVEHP-DI
WP_084749454.1 81 FSVGLETAETYSNCVYFRINSYDERBERNEALCTLDQPLKPGVLYGTETKPLGLKAGADALYDRAGYSVSADKAPDD--G
WP_032758621.1 80 FSSGLATAETYSNCLYSTIGSYDEMPERHRAVCTVDQPLKPGVLYRTETKPIGLKAGANALYDTAGLGLWASPPCPDD--G
WP_031122887.1 80 FSSGLATAETYSNCLYSTIGSYDEMPERHRAVCTVDQPLKPGVLYGTETKPIGLKAGANALYDTAGLGLWASPPCPDD--G
WP_055558699.1 80 FSSGLATAETYSNCLYSTIGSYDEMPERHRAVCTVDQPLKPGVLYGTETKPIGLKAGANALYDTAGLGLWASPPCPDD--G

WP_086778847.1 160 GADEPVPGTGDPITLVEKGPATDADRANHPEESAASADVTAANTADFGLTGAELKGEPEKVTATVKFTNAGPARVQOARD
WP_076967992.1 159 HHGEPEPGTGCPPLKLVERGEATAADRAAHAEPSRTEVTAVENTADYALTGAELQKVGDKVTALVTFTEGPARVYRDQG
WP_030568954.1 159 HHGEPEPGTGCPPLKLVERGEATAADRAAHAEPSRTEVTAVENTADYALTGAELQKVGDKVTALVTFTEGPARVYRDQG
WP_084749454.1 159 GESEHVPGTGAPLKLVERGEATEADRAAHDPDSVVGADVTAVENTADFALTGAELKGVGDKVTAQVKFTNKGPAVVMGERD
WP_032758621.1 158 GETDPVPGTGAPLTLVERGEATEADRAAHAEPSGWTVDVTAVENTADYALTGAELKGVGDKVTAQVKFTNKGPAVVIYRELG
WP_031122887.1 158 GETDPVPGTGAPLTLVERGEATEADRAAHAEPSGARTDVTAVENTADYALTGAELKGVGDKVTAQVKFTNKGPAVVIYRELG
WP_055558699.1 158 GETDPVPGTGAPLTLVERGEATEADRAAHAEPSGARTDVTAVENTADYALTGAELKGVGDKVTAQVKFTNKGPAVVIYRELG

WP_086778847.1 240 QSVATVDVHIKGTSTVKAHGYCDAVTKTHYRCGTSSQWVDVNGGESYDFVLRIDKAVGRTTGKVSFGCPERPFDNRNAN
WP_076967992.1 239 TSAANVDVHIKGTSTVKAHGYCRPVITQTHYRCGTSSQWVEAKGGETYSFVLRIDKAVGRTTGKVSFGCAARPFDKNAAN
WP_030568954.1 239 TSAANVDVHIKGTSTVKAHGYCRPVITQTHYRCGTSSQWVEAKGGETYSFVLRIDKAVGRTTGKVSFGCAARPFDKNAAN
WP_084749454.1 239 TSVTTVDVRIKGTSTVKAHGYCDAVTKTHYRCGTSSQWVDVPTDCATYFVLRIDKAVGRTTGKVSFGCAARPFDKNAAN
WP_032758621.1 238 TGAASVDVRIKGTSTVKAHGYCDAVTKTHYRCGTSSQWVDEEGGETYSFVLRIDKAVGRTTGKVSFGCQSRPFDRNPAN
WP_031122887.1 238 TGAASVDVRIKGTSTVKAHGYCDAVTKTHYRCGTSSQWVDEEGGETYSFVLRIDKAVGRTTGKVSFGCQSRPFDRNPAN
WP_055558699.1 238 TGAASVDVRIKGTSTVKAHGYCDAVTKTHYRCGTSSQWVDEEGGETYSFVLRIDKAVGRTTGKVSFGCQSRPFDRNPAN

WP_086778847.1 320 DTAQIVIDTGGKSDTSGSSGSS--GS-----TG-GTGGSSSTGGSD-----TTGGTSGTGGSSGSSGAGTGCT
WP_076967992.1 319 DTAQIVVDTPPEPFDGTSTGGTSSSTG-G--SAGPTGSTDGCTGSGGSTSGSSGSASSGSGTGGSDTGTGGSATSGSCS
WP_030568954.1 319 DTAQIVVDTPPEPFDGTSTGGTSSSTG-G--SAGPTGSTDGCTGSGGSTSGSSGSASSGSGTGGSDTGTGGSATSGSCS
WP_084749454.1 319 DTAQIVVETGEPATTGGTASTGGSGTSGSSGSSGSGTGGSDGCTGSGGSTSGSSGSGTATG-----GTTGSDSTTSGSCS
WP_032758621.1 318 DTAQIVVETGKAGSTGGTSSGSS-----ANGGSDGCTGSGGSTSGSSGSGTGGGSTD---TTGGSGSATSGGCS
WP_031122887.1 318 DTAQIVVETGKAGSTGGTSSGSS-----ANGGSDGCTGSGGSTSGSSGSGTGGGSTD---TTGGSGSATSGGCS
WP_055558699.1 318 DTAQIVVETGKAGSTGGTSSGSS-----ANGGSDGCTGSGGSTSGSSGSGTGGGSTD---TTGGSGSATSGGCS

WP_086778847.1 381 TTGGATPQTGCNLAATGSDSTLELAGAAGAAVAVAGGGIVWAVRRSAARGN
WP_076967992.1 396 TSGGTTPTQTCGGLAATGSDSTLELAGAAGAAVAVAGGGIVWAVRRSAARGN
WP_030568954.1 396 TSGGTTPTQTCGGLAATGSDSTLELAGAAGAAVAVAGGGIVWAVRRSAARGN
WP_084749454.1 393 TTGGTTPTQTCGGLAATGSDSTLELVAGAAGAAVAVAGAGLFYAMRRTAARKG
WP_032758621.1 384 TTGGATPQTGCNLAATGSDSTLELVAGAAGAAVAVAGGGIVWAVRRTAARNG
WP_031122887.1 384 TACGATPQTGCNLAATGSDSTLELVAGAAGAAVAVAGGGIVWAVRRMAARNG
WP_055558699.1 384 TACGATPQTGCNLAATGSDSTLELVAGAAGAAVAVAGGGIVWAVRRTAARNG

```

\*\*\*\*\*

```

WP_070013327.1 1 -----MITHV-----LSSRARRSV--LLSAATVMV--GGAMVSV--AHASADGHSSTENATAVA
WP_070014799.1 1 -----MITHV-----SGSRARRSA--LLGAAAVLA--GGTFLATP--AHAPAHGHSGSSKAGATA
WP_004943253.1 1 -----MSSTT--RSSFGMPVSVRRAV--VPSAAALAAALTALSAS--PASAPAT--GDHRTCAADAVV
WP_055573436.1 1 -----MNSTNSRV-----LARRRT--VVAAAAVLAAGSAALAGAGTAQATGE-----PCSASAAV
WP_055694013.1 1 -----MNSTNSRV-----PARRRT--VVAAAAVLAAGSAALAGAGTAQATGE-----PCSASAAV
WP_055606274.1 1 -----MNSTDSRA-----SARRRA--VVATATVLAAGPVALAGAGAAQATGE-----HCSASAAV
WP_055688174.1 1 -----MNSTDSRA-----SARRRA--VVATVTVLAAGPVALAGAGAAQATGE-----HCSASAAV
WP_065002969.1 1 -----MNSTDSRA-----SARRRA--VVATVTVLAAGPVALAGAGAAQATGE-----HCSASAAV
WP_078852820.1 1 MSPIGRRRWLHVSCGGSTILNSNTFRLAALA-----VAAAPVALLVAAPAHATGAT--TTTGGCKASAVV
WP_030791129.1 1 -----MNSFTFRMPACRRHRR--LVVATATALAAGPAALAGAGSARATGG--DHDRCGRADAVV
WP_064073155.1 1 -----MNSTT-----SRPSARRRTI--AAAVAAFAAGPALLTAPAA--HAT--G-----GECRASAVV
WP_073752756.1 1 -----MNSNTVRLPARLPAARRRALSTAAAVAALAGPALLAAPMA--HATGG-----GECRASAVV

WP_070013327.1 52 ARADLVQSVAD-AAKVEVKASLNSVSAEDAEETLLSAEVKCANKGQPLKLVQADVARSGAKADARRSTGHVKLAGLRAF
WP_070014799.1 52 ARADLVQSVAD-AAKVEVRASLNEVSABRSAORTLLTAEVNCANKGRELKLVQAEVARSAAKTGADRSSGHVKLAGLRAF
WP_004943253.1 56 IRAGLDVSLLDKTVRVEVNASLNDVHAFGNAARTALSVRVGCAEQGRPEVLLRADAATARATADEGTATGRAELVRAKVH
WP_055573436.1 49 IRTGLDVALLDETVNVELTVSLNEVHAFRSAHRTALTADLEGVDGGRFFSVLRAEVADARATVEGNRAEASTTLAEARIH
WP_055694013.1 49 IRTGLDVALLDGTVNVELTVSLNEVHAFRSAHRTALTADLEGVDGGRFFSVLRAEVADARATVEGNRAEASTTLAEARIH
WP_055606274.1 49 IRTGLDVALLDRTVNVELTVSLNEVHAFRSAHRTALTADLEGVDRGRFFPVLRAEADARATVEGNRAEASTTLAKARIH
WP_055688174.1 49 IRTGLDVALLDRTVNVELTVSLNEVHAFRSARRTALTADLEGVDRGRFFPVLRAEADARATVEGNRAEASTTLAKARIH
WP_065002969.1 49 IRTGLDVALLDRTVNVELTVSLNEVHAFRSARRTALTADLEGVDRGRFFPVLRAEADARATVEGNRAEASTTLAKARIH
WP_078852820.1 64 IRTALDVSLLSKTVDVELKTTLNEVHAFASAEQTALVRLDVNHCGRFFSVLRADVATANATVDKHRAEGSYNLAKARVH
WP_030791129.1 58 IRTGLDVALLNKTVNVELKVSLNEVQABASAEKTALTADLEGVDRGRFFPVLRADVATANATVKGGRAEGSYNLARAEMH
WP_064073155.1 48 IRTDLDVALLNKAVHVELTATLNEVQABASARRTALTVTLDGVEQGRFSVLMADVATAQATDGRRGEGRTELARAKVH
WP_073752756.1 56 IRTDLDVSLLDKTVHVELKATLNEVQABASARRTALTVTLDGVEQGRFSVLADVATAKATADARRAEGHTNLAHATLH

WP_070013327.1 131 APGLLGKPLVSADLLTATATCKAGEKMAKADI-ENSVLGRPVTVNGVGSQQVKVPVGVTVDVALEQETTKAASGAATA
WP_070014799.1 131 APGLLGKPLVSADLLTATATCEAGAKETAQADI-ENSVLGRPVNVNAPCGQQIKLPVGVTVDVSLEQETTKTASGAATA
WP_004943253.1 136 VPGLPLLSLIEVRQVTSEAVCRAGQRTATSNLLGPTVVLGKITLTSGGTTDVDVPGVGRVRLDLSKTATTSHTGAATA
WP_055573436.1 129 LPGLPLLSLVELEAAGSRAVCETGRTPLASATLPAAVTVLGKRVLTASGPTEVEVPGVGEVRLDLSKTETTSRTAAATA
WP_055694013.1 129 LPGLPLLSLVELEAAGSRAVCETGRTPLASATLPAAVTVLGKRVLTASGPTEVEVPGVGEVRLDLSKTETTSRTAAATA
WP_055606274.1 129 LPGLPLLSLVELEAVSSKAVCEMGRTPLASATLPAAVTVLGKRVLTASGPTEVEVPGVGEVRLDLSKTETTSRTAAATA
WP_055688174.1 129 LPGLPLLSLVELEAVSSKAVCEMGRTPLASATLPAAVTVLGKRVLTASGPTEVEVPGVGEVRLDLSKTETTSRTAAATA
WP_065002969.1 129 LPGLPLLSLVELEAVSSKAVCEMGRTPLASATLPAAVTVLGKRVLTASGPTEVEVPGVGEVRLDLSKTETTSRTAAATA
WP_078852820.1 144 LPGLPLLSLIEVEKVTSAKCEVGRRRPAESHNVLGHSVLGKRVTLTSGGTTRVDVPGVGEVRLDLSKTETTSRTAAATA
WP_030791129.1 138 VPGLPLLSLIEVEKVTSAKCEAGKRPVAEANLLGGTVLGKKVTLTAGGTTEVKVPGVGEVTLALSKRRTTSRTAVAAA
WP_064073155.1 128 VPGLPLLSLIELEKVTARALCEAGGQPVAEANVQGRVTVLGKRVTLTAGGPTKVEVPGVGEVTLTLSDTTRTTTSRTAAATA
WP_073752756.1 136 VPGLPLLSLIEVEKVTSAKCEAGQPVAEANLLGRVTVLGKRVTLTAGGPTKVDVPGVGEVTLLDSTTRTTTSRTAAATA

WP_070013327.1 210 LKLSYEVNPAKLNIVKAAGEIVLSEATCETPAGGGEETGGTGGNEPGPQTGE-----
WP_070014799.1 210 LKLSYEVNPAKLNIVKATGDIVLSEATCETPKGGSD-----GNEPGPQTGGGD-----
WP_004943253.1 216 LELAVDVNPLKLGVAEVHGRVTLVRACETPAGAGKPAEQPPAPARQAPA---K-----EATRTSGDGIKP
WP_055573436.1 209 LRLEVSVDPLKLNVAEVDGTVTLAEATCEAPGGDAAPA---PGGQREPERREEPQEQGRERERADAVPPA--GSGTGVEP
WP_055694013.1 209 LRLEVSVDPLKLNVAEVDGTVTLAEATCEAPGGDAAPA---PGGQREPERREEPQEQGRERERADAVPPA--GSGTGVEP
WP_055606274.1 209 LRLEVSVDPLKLNVAEVDGTVTLAEATCEAPGGDAAPA---PGGQREPERREEPQEQGRERERADAVPPA--GSGTGVEP
WP_055688174.1 209 LRLEVSVDPLKLNVAEVDGTVTLAEATCEAPGGDAAPA---PGGQREPERREEPQEQGRERERADAVPPA--GSGTGVEP
WP_065002969.1 209 LRLEVSVDPLKLNVAEVDGTVTLAEATCEAPGGDAAPA---PGGQREPERREEPQEQGRERERADAVPPA--GSGTGVEP
WP_078852820.1 224 LRLEVSVDPLKLNVAEVDGTVTLAEATCEAPGGDAAPA---PGGQREPERREEPQEQGRERERADAVPPA--GSGTGVEP
WP_030791129.1 218 LELKVSVDNPLKLNVAEVEGTVTLAGACCEAPRAERERTGGG---TKPQG-----KPAKPV---
WP_064073155.1 208 LALTVSVDNPLKANVADVTGTTTLAEATCESPKAPAAAAAPA---APTAP-----AAKPADVRP
WP_073752756.1 216 LALTVSVDNPLKANVADVTGTTTLAEATCESPTAP-----PKP-----AEARSAGVQF

WP_070013327.1 263 -----DGGDGLAETGGSSATPFIAGAGALLVAGCGAMYLIRRGARSTS--
WP_070014799.1 258 -GGDAGSNNGDGGGLAETGGDATPFIATAGALLVAGGTTMYLIVRRRAARNS---
WP_004943253.1 279 QTV-----ADKRDLAETGGSSATPFIAGAGALLVAGCGGAVIARRRAAARGRG
WP_055573436.1 284 RGARAGRAA---PGLAETGGDEAPYVAGGALALLAAGGAAVLLRRGRRS---
WP_055694013.1 284 RGARAGRAA---PGLAETGGDEAPYVAGGALALLAAGGAAVLLRRGRRS---
WP_055606274.1 289 QGARAERAAPARTGLAETGGDSTPPYVAGGALALLAAGGAAVLLRRGRRT---
WP_055688174.1 288 QGARAERAAPARTGLAETGGDSTPPYVAGGALALLAAGGAAVLLRRGRRT---
WP_065002969.1 289 QGTRAERAAPTRTGLAETGGDSTPPYVAGGALALLAAGGAAVLLRRGRRT---
WP_078852820.1 285 QTGTGHAPAAVDTSLAETGGSSTPPYIAGGALLLALCAGAMVVRRGAQD---
WP_030791129.1 270 --G-----HKATEANLAETGGNSTPPYIAGGAVVLLIAGGGAVAMRRSRSRG---
WP_064073155.1 264 QTA-----GEPPEANLAETGGSSLPPYLAGGSLALLACGAGALALRRARAARARG
WP_073752756.1 263 QSA-----GEPQANLAETGGSSLPPYLAGGSLALLTACAATFALRRARTTRERG

```

\*\*\*\*\*

Fig S4



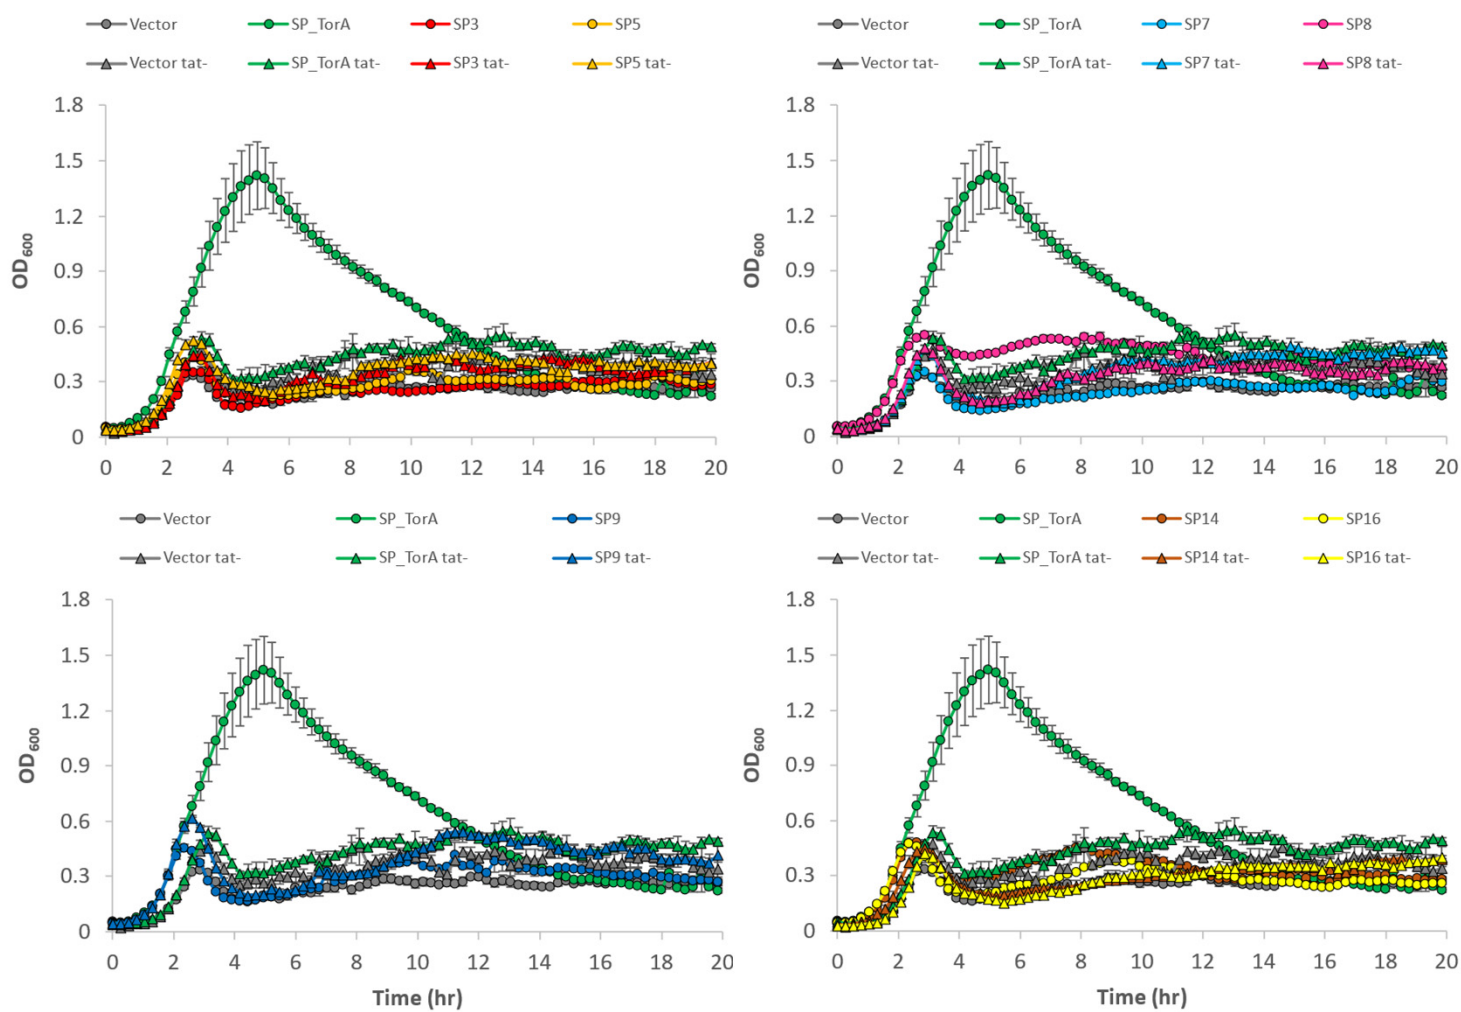

Fig S5



| NAME   | SEQUENCE 5'→3' <sup>a</sup>                   | USE <sup>b</sup> |
|--------|-----------------------------------------------|------------------|
| JES3   | ACAGAGGAGGATCCATGTCACTCAGTCGGCGTCAG           | RL               |
| JES4   | TTGCGCTCGAGCTCCGGTACCGGATTGACCAACAG           | RL               |
| C1F    | TATAGAGCTCCTGACCGACCCGCGTA                    | RL               |
| C1R    | TATAGCATGCTTAACCCCAGGTAGCA                    | RL               |
| C2F    | TATAGAGCTCACCGCTGCTCCGGACA                    | RL               |
| C2R    | TATAGCATGCTTATTAAGCCTGACCACCACC               | RL               |
| C6F    | TATAGAGCTCTCTACCCTGCCGCTGG                    | RL               |
| C6R    | TATAGCATGCTTAAGAAGCACGAGCA                    | RL               |
| C8F    | TATAGAGCTCGCTCTGGGTCCGGCTG                    | RL               |
| C8R    | TATAGCATGCTTACGGACGACGACGTT                   | RL               |
| SP1F   | TATAGGATCCATGCGTCACGCTCG                      | RL               |
| SP1R   | TATATCTAGAAGCAACAGCGTTGGTA                    | RL               |
| SP2F   | TATAGGATCCATGACCACCTCTTCTC                    | RL               |
| SP2R   | TATATCTAGATAGCAGCAGCCTGGTCC                   | RL               |
| SP4F   | TATAGGATCCATGGGTAACGCTGTTT                    | RL               |
| SP4R   | TATATCTAGAAGCCTGAGCCGGAGCAGAAC                | RL               |
| SP8F   | TATAGGATCCATGTCTCTGCGTCGTC                    | RL               |
| SP8R   | TATATCTAGAAGCCAGAGCAGCCGGAGCAGCCA             | RL               |
| SP9F   | TATAGGATCCATGTCTGGTATGGC                      | RL               |
| SP9R   | TATATCTAGAAGCAACTTCCGGAGCC                    | RL               |
| ESN102 | TGTAAAACGACGGCCAGT                            | RL               |
| ESN103 | CAGGAAACAGCTATGAC                             | RL               |
| ESN237 | AGCTGGCACACCACCTTCCAC                         | RL               |
| ESN434 | GTGGAAGGTGGTGTGCCAGCT                         | RL               |
| ESN526 | CGTATGTTGTGTGGAATTGTGAGC                      | SEQ              |
| ESN527 | GGGTAACGCCAGGGTTTTCCC                         | SEQ              |
| ESN538 | GTGACCTGGATCGAGAACACG                         | SEQ              |
| ESN539 | CGGACAAGTGGAGCTGCTTG                          | SEQ              |
| ESN540 | CAGTGAGTGGATCCATGACCTCTCGTCGTGGTACCTTC        | RL               |
| ESN541 | CCTAGTTCCCTCTAGAAGCCAGAGCCGGCGGAGCCAG         | RL               |
| ESN542 | CAGTGAGTGGATCCATGCCGGCGACCAACCGGTGATC         | RL               |
| ESN543 | CCTAGTTCCCTCTAGACGCCGCCGCGGTGGTCGGCG          | RL               |
| ESN544 | CAGTGAGTGGATCCATGGGTATCGCTGCTTCTGGTCGTC       | RL               |
| ESN545 | CCTAGTTCCCTCTAGAAGCCAGAGCACGAACACCCAG         | RL               |
| ESN546 | CAGTGAGTGGATCCATGAGCCGTCGTCTGACCGCGCTG        | RL               |
| ESN547 | CCTAGTTCCCTCTAGACGCGCTCGCGCTGGTCGCC           | RL               |
| ESN550 | CAGTGAGTGAGCTCGCTGGTACCCCGCTGGCTGTTCTG        | RL               |
| ESN551 | CCTAGTTCCGCATGCTTACAGACCCAGGGTACGCTGAACC      | RL               |
| ESN552 | CAGTGAGTGAGCTCCAGACCGGTGGTGACCTGGCTGC         | RL               |
| ESN553 | CCTAGTTCCGCATGCTTAAACCGTTACGAGCAGCCATACGACGAC | RL               |
| ESN554 | CAGTGAGTGAGCTCGGTAGCGACGCGCCGGTTGCG           | RL               |
| ESN555 | CCTAGTTCCGCATGCTTACGCCTGCGCATCACGCGCACC       | RL               |
| ESN556 | CAGTGAGTGAGCTCGACGATGCGACCCCGGCGGCG           | RL               |
| ESN557 | CCTAGTTCCGCATGCTTACGCACCCGCCGCACGACGAC        | RL               |
| ESN565 | CAGTGAGTGAGCTCGTTGCTTCTCTGCCGTGGCTG           | RL               |
| ESN566 | CCTAGTTCCGCATGCTTACGGCTGAGCTTCGGTCAGC         | RL               |
| ESN584 | CAGTGAGTGAGCTCCCGGAGCTGTATCACGGTC             | RL               |
| ESN585 | CCTAGTTCCGCATGCTTACTCATGATGATCCTCCTCGTC       | RL               |
| ESN591 | GGTCAATCCGGTACCGTAAGCATGCAAGCTTGGCGTAATCATGG  | QC               |
| ESN592 | CTTACGGTACCGGATTGACCAACAGTTGCCCAATCGAGCCAC    | QC               |
| ESN669 | AACGCAGCTACTCTGTGGTATC                        | SEQ              |
| ESN675 | CAGAGCAGCCAGACCCAGAGC                         | KLD              |

|        |                                 |     |
|--------|---------------------------------|-----|
| ESN676 | CTGGGTGGT <b>GCCT</b> CTGACGCTC | KLD |
|--------|---------------------------------|-----|

**Table S1. Oligonucleotides used in this study.**

a = restriction sites used for restriction-ligation cloning of SP/CT-encoding PCR products are underlined (please note that, unlike the gBlocks for SP/CT 1-9, those for SP/CT 10-16 were synthesised to include these sites already and the target sequences were amplified from conserved extensions for the re-usable oligos ESN102, ESN103, ESN237, and ESN434). The start codons of SP-coding sequences and the stop codons of CT-coding sequences are in italics. The C24A mutant codon of SP9 is in bold.

b = molecular application of each primer. RL: restriction-ligation cloning; QC: QuickChange whole-plasmid PCR; KLD: whole-plasmid PCR circularised with NEB's KLD kit; SEQ: sequencing (ESN526 and ESN527: annealing to opposite ends of the multiple cloning site of the pSU40 backbone; ESN538: internal *amiA* primer; ESN539 and ESN669: internal *sufI* primers).

| NAME | SEQUENCE                                                                                                                                           |
|------|----------------------------------------------------------------------------------------------------------------------------------------------------|
| SP1  | ATGCGTCACGCTCGTCGTGTTGTTTCGTTCGTGTTACCCGTCTGGCTGCTGTTGGTGGTCTGCTGCTGGGTGGTGCTATGG<br>TTACCAACGCTGTTGCT                                             |
| SP2  | ATGACCACCTCTTCTCCGTCTGCTCCGCGTCGTTCGTATCCTGCGTTCTGCTACCGCTCTGGTTGGTGGTGTGCTCTGGCTGT<br>TGCTGTTCCGCTGGCTGCTTCTGCTCACGTTTCGTGTTTCTCCGGACCAGGCTGCTGCT |
| SP3  | ATGACCTCTCGTCGTGGTACCTTCCTGGCTGCTCTGGTTACCGCTTCTCTGATCCCGCTGGCTCCGCCGGCTCTGGCT                                                                     |
| SP4  | ATGGGTAACGCTGTTTCTGGTCGTTCGTACCTGCTGTCTGGTACCGCTGTTCTGGCTGCTGTTGCTCTGATCGCTCTGGGTTC<br>TGCTCCGGCTCAGGCT                                            |
| SP5  | ATGCCGGCGACCAACCGGTGATCGTAGCCGTTCGTTCGTCCGCTGGCGTTTGCGGCGGCGGTTGCGACCGCGGCGGCGATTGG<br>CGCGGCGAGCTTGGCGGCGGCGCCGACCAACCGCGGCGGCG                   |
| SP6  | ATGGGTATCGCTGCTTCTGGTCGTTCGTACCTGCTGTCTGCTACCGCTGTTTCTGCTACCGCTGCTCTGATCGCTCTGGGTGC<br>TGCTCCGGCTCAGGCTGACGCTATCAAACCGGACCTGGGTGTTTCGTGCTCTGGCT    |
| SP7  | ATGAGCCGTTCGTTCGTACCGCGCTGCTGACCGCGCCGGCTGCTGCGGCGGCGGCGGCGCTGACCCTGGTGGGCGCGGCGA<br>CCAGCGCGAGCGCG                                                |
| SP8  | ATGTCTCTGCGTCGTTCGTGCTGCTCTGCTGGTTACCGCTGCTTCTACCCTGACCGCTCTGGCTGCTCCGGCTGCTCTGGCT                                                                 |
| SP9  | ATGTCTGGTATGGCTGGTCGTTCGTTCGTGGTTGCTGCTGCTCTGGGTCTGGCTGCTCTGCTGGGTGGTTGCTCTGACGCTC<br>GTCCGCCGGCTCCGGAAGTTGCT                                      |
| SP10 | ATGACGCCTAACCGCCGTCTGTGGTACTTGCCGCAGCGGTAGCAACCGCTTTGGGGTTAGGGGCTACTGCTCTTACGTTAC<br>CGGCTGTGGCG                                                   |
| SP11 | ATGTTAACACGCCGCAACGCTTTAAGCGCGCTTGCCTTAGGCGTCGTTCGGAGTGTTCGATCGCTCCAACAGCCTTGGCG                                                                   |
| SP12 | ATGAAGAACCTTAAGCGCGTACCTTTGGCAGGGCGTCGCACAGCTGTCGCCGCGGCCGCCGACCCACTGCGGTGGCATT<br>GCAGGCCCTGCTTACGCG                                              |
| SP13 | ATGAACAGTACAACCTCGCGTCCAAGTGCACGTGCCGCACTATTGCCGCTGCTGTAGCCGCATTGCTGCTGGTCCAGCTC<br>TTCTTACTGCACCCGCCGCACATGCG                                     |
| SP14 | ATGAGTCCTATTGGTCGCCGCCGCTGGTTACACGTGTCTTGTGGGGGATCAACTATCTTAACTCTAATACCTTTGCGCTTGCT<br>GCCCTTGCTGTAGCTGCTGCTCCTGTAGCCCTTCTGGTGGCCGCACCTGCCCATGCG   |
| SP15 | ATGCCTGCGCCGAAGAAAGCGCTTCGCCGTTCTTTGACTGTTACCTCGGCCGCGTTAACAGCTTTGGCATTGCTGTCTCCTGC<br>AGCTCTTGCG                                                  |
| SP16 | ATGCGCGACTCCTCTGGCCTTTGCGGCCGTGCAGCCTTGGGACTTGCAGCGGCCTTGCCCTTAGCTGCAGCAACGGCAACG<br>ACAGCTGATGCG                                                  |
| CT1  | CTGACCGACCCGCGTAACGTTGGTCCGGGTCTGCTGGTTATCGCTGGTTCTCTGGTTGCTCTGGTTGCTACCCGTTGGATCC<br>GTGCTGAACAGGACCGTAAAGCTTACCGTCAGCACTACTCTGCTACCTGGGGTTAA     |

|       |                                                                                                                                                                                        |
|-------|----------------------------------------------------------------------------------------------------------------------------------------------------------------------------------------|
| CT2   | ACCGCTGCTCCGGACACCACCGTTACCACCGCTGCTTCTGACACCTCTGCTACCTCTTCTGCTGTTGCTGTTGGTCTGGGTGT<br>TGGTGGTCTGGCTCTGGGTGCTGTTGCTCTGGTTGTTGCTGTTTTCGCTCTGACCCGTGTTCTGTCGTGAAGGTGGTGGTCAG<br>GCTTAA   |
| CT3   | GCTGGTACCCCGCTGGCTGTTCTGCTGGGTCTGTTGCTGCTATCGCTGTTGCTGTTGGTGGTATCAAACCGCTGCACTCTTT<br>CCTGCTGCAGGTTTACGCGTACCCTGGGTCTGTAA                                                              |
| CT4   | CAGACCGGTGGTGACCTGGCTGCTACCGGTTCTGACTCTACCCTGCCGGTTGCTGGTGCTGCTGGTGCTGCTCTGCTGGCTG<br>GTGGTGGTCTGTTCTACGCTATGCGTCGTCGTATGGCTGCTCGTAACGGTTAA                                            |
| CT5   | GGTAGCGACGCGCCGGTTGCGGCGCTGGGCACCGCGGCGGCGCTGGCGGTGGCGGCGGGTGCGGGCGTGTTTTTCGCGG<br>TTCGTCGTCGTCTGGTGCGCGTGATGCGCAGGCGTAA                                                               |
| CT6   | TCTACCCTGCCGCTGGCTGGTGCTGCTGGTGCTGCTCTGCTGGCTGGTGTTCTATCGTTTGGGCTGTTCTGTCGTCTGTTCTG<br>CTGCTCGTGCTTCTTAA                                                                               |
| CT7   | GACGATGCGACCCCGGCGGCGCGTGCGCAAGTGCGTGCGAGCGCGCAAGAGCGTAGCGAAGTTCTGGCGGCGACCGGTG<br>CGCGTACCGGCGTGCTGCTGGCGGCGGGTGCGCTGGCGCTGGGTCTGGGTGCGGGTCTGTTACCTGGCGTCGTCTGTCGT<br>GCGGCGGGTGCGTAA |
| CT8   | GCTCTGGGTCCGGCTGCTACCAAACGTGCTACCGGTGCTGAAGTGCCTTCTGACGACAAAAAGACGACGGTCTGTCTTCTT<br>CTGCTACCACCTGGATCATCGTTGGCGTTGTATTCGTCTGCTTCTGCTGGTTTTGGTCTGCTGCTGTCTGGTCTGTAACGTCGT<br>CGTCCGTAA |
| CT9   | GTTGCTTCTCTGCCGTGGCTGCCGGTTGCTGCTATCGGTCTGCTGCTGGTTCGTGTTCTGTGGCGTCTGCGTCGTCTGTCGT<br>GTGCTCGTATCGGTCTGCTCCGCTGACCGAAGCTCAGCCGTAA                                                      |
| CT10  | GGCGCACTTGCGTCTACTGGTGCCGAAGTCAACGCTGGGGCCCTGGCAGGGGGCTGCCGCATTAGTGGTCGCCGCGGGCGC<br>TGGCGTGGTGGTGGCGGCGTAA                                                                            |
| CT10* | GGCGCACTTGCGTCTACTGGTGCCGAAGTCAACGCTGGGGCCCTGGCAGGGGGCTGCCGCATTAGTGGTCGCCGCGGGCGC<br>TGGCGTGGTGGTGGCGGCGCGTCGCCGTAATGCTGCCGGGGATGCCGCTAGCTAA                                           |
| CT11  | GGCGCGGACGCACTGTCCTTATTAGGAATCGCAGGGGGCTGCTTCGGTAGCAGGTGCCGGGTTTATGTTATCACGTCGCAAAA<br>ACGACTCGGAATAA                                                                                  |
| CT12  | GGTAGTAGTGCGACTACCGTTGCAATGGGTGCAGCAGCGACAGGACTTGTCTTAGCAGGAGCCGGTGCTCTGTATGCTGTCC<br>GCCGTCGTGCGAATAGCTAA                                                                             |
| CT13  | GGTAGCTCGTTGACTCCATACTTGGCTGGAGGATCGTTGGCGCTTTTAGCTGGGGGAGCCGGCGCACTTGCGCTTACGCGC<br>CGTGCCCGTGCGGCTCGCGCTCGTGGCTAA                                                                    |
| CT14  | GGTAGCAGCACTACGCCCTACATTGCGGGCGGTGCCGCTTTGTTGTTAGCTTTAGGGGCTGGTGCAATGGTAGTAGCCCGCC<br>GCCGTGGAGCCCAGGATTAA                                                                             |
| CT15  | GGCGCCGGCGTCGCTGCTGGCATCGCGGCTGGGGTTTTAGCATTGTTAGCAGGAGGAGCTTTTCTGATTAACCGTAAATGGC<br>CGTTGCCAGATTTGGTCCGCCGTCGTACCCGCCCGTAA                                                           |

|      |                                                                                                                                                                                          |
|------|------------------------------------------------------------------------------------------------------------------------------------------------------------------------------------------|
| CT16 | GGCGCACCGTGGGGTTTAGTTGGAGGTGCAGGTGCTGCCGTCGCACTGCTTGCAGGCGGAGCACTGGCCTTGCGCCGTCGT<br>CGTCGCGCAGCAGGTGAAGCAAGTGAACCAGTAGATGCTGTAGAGGAAGGTGCTGCTGAACCTAGCGAAGCTAAGGGTCGG<br>CGTCGTCGTCGTAA |
|------|------------------------------------------------------------------------------------------------------------------------------------------------------------------------------------------|

**Table S2.** DNA sequences of codon-optimised signal peptide and C-tail coding sequences used in this study.

| Accession      | Organism                                | Genomic module                           |
|----------------|-----------------------------------------|------------------------------------------|
| WP_013506165.1 | <i>Desulfurispirillum indicum</i>       | FeS-CytB                                 |
| WP_014856242.1 | <i>Melioribacter roseus</i>             | FeS-quinol oxidase-CytC3                 |
| WP_049676148.1 | <i>Desulfocarbo indianensis</i>         | FeS-quinol oxidase- octahaem CytC        |
| WP_028325305.1 | <i>Desulfatirhabdium butyrativorans</i> | FeS-quinol oxidase- octahaem CytC        |
| WP_054030243.1 | <i>Desulfatitalea tepidiphila</i>       | FeS-quinol oxidase- CytC3- octahaem CytC |
| WP_020589710.1 | <i>Desulfobacter curvatus</i>           | FeS-CytB                                 |
| WP_004071579.1 | <i>Desulfobacter postgatei</i>          | FeS-CytB                                 |
| WP_084070237.1 | <i>Desulfobacterium vacuolatum</i>      | FeS-quinol oxidase- octahaem CytC        |
| WP_014957271.1 | <i>Desulfobacula toluolica</i>          | FeS-CytB                                 |
| WP_012173729.1 | <i>Desulfococcus oleovorans</i>         | FeS-CytB                                 |
| WP_054692440.1 | <i>Desulfosarcina cetonica</i>          | FeS-quinol oxidase-CytC3-CytC3           |
| WP_022663865.1 | <i>Desulfospira joergensenii</i>        | FeS-CytB                                 |
| WP_015723347.1 | <i>Desulfobulbus propionicus</i>        | CytC3-FeS-quinol oxidase                 |
| WP_027370080.1 | <i>Desulfovermiculus halophilus</i>     | FeS-quinol oxidase- CytC3- octahaem CytC |
| WP_071544310.1 | <i>Desulfovibrio dechloracetivorans</i> | FeS-CytB                                 |
| WP_071546240.1 | <i>Desulfovibrio dechloracetivorans</i> | FeS-quinol oxidase- octahaem CytC        |
| WP_062251202.1 | <i>Desulfovibrio fairfieldensis</i>     | FeS-CytB                                 |
| WP_066806246.1 | <i>Desulfovibrio indicus</i>            | FeS-quinol oxidase-octahaem CytC         |
| WP_008683453.1 | <i>Desulfovibrio sp. 3_1_syn3</i>       | FeS-CytB                                 |
| WP_009302998.1 | <i>Desulfovibrio sp. 6_1_46AFAA</i>     | FeS-CytB                                 |
| WP_014259604.1 | <i>Desulfovibrio africanus</i>          | FeS-CytB                                 |
| WP_027368072.1 | <i>Desulfovibrio africanus</i>          | FeS-CytB                                 |
| WP_029459533.1 | <i>Desulfovibrio alcoholivorans</i>     | FeS-CytB                                 |
| WP_020886939.1 | <i>Desulfovibrio alkalitolerans</i>     | FeS-CytB                                 |
| WP_014323720.1 | <i>Desulfovibrio desulfuricans</i>      | FeS-quinol oxidase-octahaem CytC         |

|                  |                                                    |                          |
|------------------|----------------------------------------------------|--------------------------|
| WP_022659754.1   | <i>Desulfovibrio desulfuricans</i>                 | FeS-CytB                 |
| WP_024823537.1   | <i>Desulfovibrio magneticus</i>                    | FeS-CytB                 |
| WP_015862494.1   | <i>Desulfovibrio magneticus</i>                    | FeS-CytB                 |
| WP_015416321.1   | <i>Desulfovibrio piezophilus</i>                   | FeS-CytB                 |
| WP_027985824.1   | <i>delta proteobacterium PSCGC 5451</i>            | FeS-CytB                 |
| WP_003398576.1   | <i>Anoxybacillus flavithermus</i>                  | FeS-CytB                 |
| WP_008409599.1   | <i>Desulfotomaculum hydrothermale</i>              | FeS-CytB                 |
| WP_012447020.1   | <i>Natranaerobius thermophilus</i>                 | FeS-CytB                 |
| WP_011418038.1   | <i>Syntrophus aciditrophicus</i>                   | FeS-CytB                 |
| YP_002248525.1   | <i>Thermodesulfovibrio yellowstonii</i>            | FeS-CytB                 |
| WP_051534117.1** | <i>Desulfitibacter alkalitolerans</i><br>DSM 16504 | FeS-CytB                 |
| WP_028318203.1** | <i>Desulfobulbus elongatus</i> DSM 2908            | CytC3-FeS-quinol oxidase |
| WP_028580723.1** | <i>Desulfogranum japonicum</i><br>DSM 18378        | CytC3-FeS-quinol oxidase |
| WP_035247752.1** | <i>Desulfogranum mediterraneum</i> DSM 13871       | CytC3-FeS-quinol oxidase |
| WP_020676593.1** | <i>Geopsychrobacter electrodiphilus</i> DSM 16401  | CytC3-FeS-quinol oxidase |
| WP_004088007.1** | <i>Helicobacter bilis</i>                          | FeS-CytB                 |
| WP_072908093.1** | <i>Malonomonas rubra</i> DSM 5091                  | CytC3-FeS-quinol oxidase |
| WP_053334878.1** | <i>Thermoanaerobaculum aquaticum</i>               | CytC3-FeS-quinol oxidase |

Table S3. 4Fe-4S tail-anchored ferredoxin proteins, and partner proteins with which they are co-encoded at the same genomic locus. \*\* Indicates proteins that were identified in dataset S2.



|                         |                                                                                                     |
|-------------------------|-----------------------------------------------------------------------------------------------------|
| FAD-containing proteins |                                                                                                     |
| WP_056452081.1          | FAD-dependent oxidoreductase <i>Brevundimonas</i> sp. Root1279                                      |
| WP_082731613.1          | FAD-dependent oxidoreductase, <i>Sphingomonas</i>                                                   |
| YP_001636932.1          | FAD-dependent pyridine nucleotide-disulfide oxidoreductase, <i>Chloroflexus aurantiacus</i> J-10-fl |
| WP_082690100.1          | FAD-binding monooxygenase, <i>Leptolyngbya</i> sp. NIES-2104                                        |
| WP_052700213.1**        | FAD/NAD(P)-binding oxidoreductase, <i>Methylococcus oryzae</i>                                      |
| WP_020186848.1**        | NAD(P)/FAD-dependent oxidoreductase, <i>Methylophilus</i> sp. 73B                                   |
| NAD-containing proteins |                                                                                                     |
| WP_046090413.1          | NAD-dependent dehydratase, <i>Streptomyces antioxidantans</i>                                       |
| WP_030280942.1          | NAD-dependent dehydratase, <i>Streptomyces catenulae</i>                                            |
| WP_052860708.1          | NAD-dependent dehydratase, <i>Streptomyces celluloflavus</i>                                        |
| WP_062046107.1          | NAD-dependent dehydratase, <i>Streptomyces ciscaucasicus</i>                                        |
| WP_078643469.1          | NAD-dependent dehydratase, <i>Streptomyces hygroscopicus</i>                                        |
| WP_044570187.1          | NAD-dependent dehydratase, <i>Streptomyces iranensis</i>                                            |
| WP_079429679.1          | NAD-dependent dehydratase, <i>Streptomyces katrae</i>                                               |
| WP_067236815.1          | NAD-dependent dehydratase, <i>Streptomyces longwoodensis</i>                                        |
| WP_055470700.1          | NAD-dependent dehydratase, <i>Streptomyces pathocidini</i>                                          |
| WP_086886330.1          | NAD-dependent dehydratase, <i>Streptomyces rhizosphaericus</i>                                      |
| WP_051779201.1          | MULTISPECIES: NAD-dependent dehydratase, <i>Streptomyces</i>                                        |
| WP_065964212.1          | NAD-dependent dehydratase, <i>Streptomyces sparsogenes</i>                                          |
| WP_053757466.1          | NAD-dependent dehydratase, <i>Streptomyces</i> sp. AS58                                             |
| WP_037799844.1          | MULTISPECIES: NAD-dependent dehydratase, <i>Streptomyces</i>                                        |
| WP_069765881.1          | NAD-dependent dehydratase, <i>Streptomyces</i> sp. LUP47B                                           |
| WP_073773307.1          | NAD-dependent dehydratase, <i>Streptomyces</i> sp. MJM1172                                          |
| WP_055547987.1          | NAD-dependent dehydratase, <i>Streptomyces</i> sp. NBRC 110028                                      |
| WP_031076788.1          | NAD-dependent dehydratase, <i>Streptomyces</i> sp. NRRL S-118                                       |
| WP_030711692.1          | NAD-dependent dehydratase, <i>Streptomyces</i> sp. NRRL S-237                                       |
| WP_037952333.1          | NAD-dependent dehydratase, <i>Streptomyces</i> sp. PRh5                                             |
| WP_057612235.1          | NAD-dependent dehydratase, <i>Streptomyces</i> sp. Root369                                          |
| WP_009715199.1          | MULTISPECIES: NAD-dependent dehydratase, <i>Streptomyces</i>                                        |
| WP_069815624.1          | NAD-dependent dehydratase, <i>Streptomyces</i> sp. TP-A0874                                         |
| WP_079154649.1          | NAD-dependent dehydratase, <i>Streptomyces subbrutillus</i>                                         |
| WP_030878525.1          | NAD-dependent dehydratase, <i>Streptomyces varsoviensis</i>                                         |
| WP_059145201.1          | NAD-dependent dehydratase, <i>Streptomyces violaceusniger</i>                                       |
| WP_051763101.1          | NAD-dependent dehydratase, <i>Streptomyces virginiae</i>                                            |

|                                                      |                                                                               |
|------------------------------------------------------|-------------------------------------------------------------------------------|
| WP_053167991.1                                       | NAD-dependent dehydratase, <i>Streptomyces virginiae</i>                      |
| WP_014176621.1                                       | NAD-dependent dehydratase, <i>Streptomyces bingchenggensis</i>                |
| WP_030225883.1                                       | NAD-dependent dehydratase, <i>Streptomyces lavendulae</i>                     |
| WP_065964212.1                                       | NAD-dependent dehydratase, <i>Streptomyces sparsogenes</i>                    |
| WP_014054769.1                                       | NAD-dependent dehydratase, <i>Streptomyces violaceusniger</i>                 |
| WP_087353490.1                                       | NAD-dependent protein deacylase, <i>Olsenella</i> sp. An188                   |
| Copper-containing proteins                           |                                                                               |
| WP_026166134.1                                       | copper resistance protein, <i>Corynebacterium mastitidis</i>                  |
| WP_085235053.1                                       | copper resistance protein CopC, <i>Mycobacterium conspicuum</i>               |
| WP_066814184.1                                       | copper resistance protein CopC, <i>Mycobacterium</i> sp. 1100029.7            |
| WP_077078633.1                                       | copper resistance protein CopC, <i>Mycobacterium</i> sp. AB215                |
| WP_005248910.1                                       | MULTISPECIES: copper resistance protein C, <i>Rhodococcus</i>                 |
| WP_039951718.1                                       | copper resistance protein CopC, <i>Rhodococcus imtechensis</i>                |
| WP_041811727.1                                       | copper resistance protein CopC, <i>Rhodococcus jostii</i>                     |
| WP_012691057.1                                       | copper resistance protein C, <i>Rhodococcus opacus</i>                        |
| WP_005254749.1                                       | copper resistance protein, <i>Rhodococcus opacus</i>                          |
| WP_037228321.1                                       | copper resistance protein CopC, <i>Rhodococcus wratislaviensis</i>            |
| WP_006540442.1                                       | copper resistance protein CopC, <i>Frankia</i> sp. EUN1f                      |
| WP_006594284.1                                       | copper resistance protein C, <i>Kineosphaera limosa</i>                       |
| WP_052129147.1,<br>WP_053773647.1,<br>WP_081235111.1 | copper resistance protein CopC, <i>Clavibacter michiganensis</i>              |
| WP_048809232.1                                       | MULTISPECIES: Copper resistance protein C precursor, <i>Microbacterium</i>    |
| WP_067311181.1                                       | copper resistance protein CopC, <i>Micromonospora rifamycinica</i>            |
| WP_083706190.1**                                     | copper resistance protein CopC, <i>Arthrobacter</i> sp. QXT-31                |
| WP_051866792.1**                                     | copper resistance protein CopC, <i>Corynebacterium atypicum</i>               |
| WP_018023019.1**                                     | copper resistance protein CopC, <i>Corynebacterium doosanense</i> CAU         |
| WP_083352005.1**                                     | copper resistance protein CopC, <i>Leucobacter chromiiresistens</i> DSM 22788 |
| WP_058594659.1**                                     | copper resistance protein CopC, <i>Leucobacter chromiiresistens</i> NS354     |
| WP_082334822.1**<br>WP_076688294.1**                 | copper resistance protein CopC, <i>Microbacterium aurantiacum</i>             |
| WP_058232366.1**                                     | copper resistance protein CopC, <i>Microbacterium enclense</i>                |
| WP_082784215.1**                                     | copper resistance protein CopC, <i>Microbacterium laevaniformans</i>          |
| WP_084344888.1**                                     | copper resistance protein CopC, <i>Microbacterium resistens</i> NBRC 103078   |
| WP_029266231.1**                                     | copper resistance protein CopC, <i>Microbacterium</i> sp. Cr-K32              |

|                  |                                                                                     |
|------------------|-------------------------------------------------------------------------------------|
| WP_082516518.1** | copper resistance protein CopC, <i>Microbacterium</i> sp. Leaf436                   |
| WP_054678997.1** | copper resistance protein CopC, <i>Microbacterium</i> sp. No. 7                     |
| WP_076674855.1** | copper resistance protein CopC, <i>Microbacterium</i> sp. RU1D                      |
| WP_016463500.1** | copper resistance protein CopC, <i>Microbacterium</i> sp. oral taxon 186 str. F0373 |
| WP_067359874.1** | copper resistance protein CopC, <i>Micromonospora rosaria</i>                       |
| WP_079705109.1** | copper resistance protein CopC, <i>Plantibacter cousiniae</i>                       |
| WP_079001510.1** | copper resistance protein CopC, <i>Plantibacter flavus</i>                          |
| WP_085511799.1** | copper resistance protein CopC, <i>Plantibacter flavus</i> DSM 14012                |
| WP_064294246.1** | copper resistance protein CopC, <i>Plantibacter</i> sp. H53                         |
| WP_056779050.1** | copper resistance protein CopC, <i>Plantibacter</i> sp. Leaf171                     |
| WP_056008599.1** | copper resistance protein CopC, <i>Plantibacter</i> sp. Leaf314                     |
| WP_071259775.1** | copper resistance protein CopC, <i>Plantibacter</i> sp. MMLR14_011                  |
| WP_086474591.1** | copper resistance protein CopC, <i>Plantibacter</i> sp. VKM Ac-1784                 |
| WP_040269875.1** | copper resistance protein CopC, <i>Streptomonospora alba</i>                        |
| WP_051814695.1** | copper resistance protein CopC, <i>Streptomyces iakyrus</i>                         |

Table S4. Candidate tail-anchored Tat substrates that are predicted to bind FAD, NAD or copper cofactors. \*\* Indicates proteins that were identified in dataset S2.

| Accession                                                            | Organism                            | Further analysis                                                                                                                                                                                        |
|----------------------------------------------------------------------|-------------------------------------|---------------------------------------------------------------------------------------------------------------------------------------------------------------------------------------------------------|
| 'Tat pathway protein signal' annotation                              |                                     |                                                                                                                                                                                                         |
| WP_012680923.1                                                       | <i>Acidobacterium capsulatum</i>    | Has N-terminal pyridoxal phosphate-dependent aminotransferase (PRK09105) domain. The twin arginines form part of this domain and are therefore unlikely to form part of a signal sequence.              |
| WP_050369614.1                                                       | <i>Streptomyces acidiscabies</i>    | alginate lyase family protein. The C-tail is conserved but the twin arginine motif is not conserved across close homologues                                                                             |
| WP_067001745.1                                                       | <i>Streptomyces cellostaticus</i>   | alginate lyase family protein. The C-tail is conserved but the twin arginine motif is not conserved across close homologues                                                                             |
| WP_046705711.1                                                       | <i>Streptomyces europaeiscabiei</i> | alginate lyase family protein. The C-tail is conserved but the twin arginine motif is not conserved across close homologues                                                                             |
| WP_086800221.1<br>WP_079024514.1<br>WP_086747795.1<br>WP_086754741.1 | <i>Streptomyces scabiei</i>         | alginate lyase family protein. The C-tail is conserved but the twin arginine motif is not conserved across close homologues                                                                             |
| WP_070699546.1                                                       | <i>Atopobium</i> sp. HMSC064B08     | Protein with an N-terminal peptidoglycan hydrolase CwIO domain and a C-terminal NLPC_P60 domain. The NLPC_P60 domain overlaps with the hydrophobic stretch and it is therefore unlikely to be a C-tail. |
| 'Twin-arginine translocation annotation'                             |                                     |                                                                                                                                                                                                         |
| WP_088345824.1                                                       | <i>Rhodomicrobium vannielii</i>     | ABC transporter substrate-binding protein, FhuD family. The hydrophobic nature of the C-terminal region is not conserved across close homologues                                                        |
| WP_035708011.1                                                       | <i>Haematobacter massiliensis</i>   | Has a C-terminal lipid-binding SYLF domain that covers the hydrophobic 'tail' region and is therefore unlikely to be a TMH.                                                                             |
| WP_008328674.1                                                       | <i>Maritimibacter alkaliphilus</i>  | Has a C-terminal lipid-binding SYLF domain that covers the hydrophobic 'tail' region and is therefore unlikely to be a TMH.                                                                             |
| WP_072295392.1                                                       | <i>Paracoccus</i> sp. SM22M-07      | Has a C-terminal lipid-binding SYLF domain that covers the hydrophobic 'tail' region and is therefore unlikely to be a TMH.                                                                             |
| WP_068297290.1                                                       | <i>Rhodobacter</i> sp. CCB-MM2      | Has a C-terminal lipid-binding SYLF domain that covers the hydrophobic 'tail' region and is therefore unlikely to be a TMH                                                                              |
| WP_007290909.1<br>WP_007293159.1                                     | delta proteobacterium MLMS-1        | 4Fe-4S dicluster domain-containing protein. These protein records were suppressed because they are no longer annotated on any genome and Blast analysis fails to identify any close homologues.         |
| WP_057494184.1<br>WP_074726554.1                                     | <i>Stenotrophomonas pavanii</i>     | Gluconate 2-dehydrogenase subunit 3. The hydrophobic tail region is part of the gluconate_2-dh3 fold and unlikely to be a TMH.                                                                          |
| WP_061479189.1                                                       | <i>Stenotrophomonas</i> sp. DDT-1   | Gluconate 2-dehydrogenase subunit 3. The hydrophobic tail region is part of the gluconate_2-dh3 fold and unlikely to be a TMH.                                                                          |
| WP_087921816.1                                                       | <i>Stenotrophomonas</i> sp. WZN-1   | Gluconate 2-dehydrogenase subunit 3. The hydrophobic tail region is part of the gluconate_2-dh3 fold and unlikely to be a TMH.                                                                          |

|                                                                                                                                                                                                                                                                                                                                                    |                                         |                                                                                                                                |
|----------------------------------------------------------------------------------------------------------------------------------------------------------------------------------------------------------------------------------------------------------------------------------------------------------------------------------------------------|-----------------------------------------|--------------------------------------------------------------------------------------------------------------------------------|
| WP_049467359.1<br>WP_049404954.1<br>WP_046429410.1<br>WP_065196568.1<br>WP_065186014.1<br>WP_058980795.1<br>WP_072168650.1<br>WP_057496275.1<br>WP_065198061.1<br>WP_064237859.1<br>WP_049434537.1<br>WP_087802949.1<br>WP_088496559.1<br>WP_053462412.1<br>WP_053505877.1<br>WP_053442649.1<br>WP_054171204.1<br>WP_062606679.1<br>WP_049403241.1 | <i>Stenotrophomonas maltophilia</i>     | Gluconate 2-dehydrogenase subunit 3. The hydrophobic tail region is part of the gluconate_2-dh3 fold and unlikely to be a TMH. |
| WP_035353858.1**                                                                                                                                                                                                                                                                                                                                   | <i>Edaphobacter aggregans</i> DSM 19364 | No homologues in the database.                                                                                                 |
| WP_083145723.1**                                                                                                                                                                                                                                                                                                                                   | <i>Mycolicibacterium parafortuitum</i>  | RR conserved. However AlphaFold model suggests that the hydrophobic region is part of the protein fold.                        |
| WP_083090608.1**                                                                                                                                                                                                                                                                                                                                   | <i>Rothia nasimurium</i>                | Homologue of WP_083145723.1                                                                                                    |

Table S5. Protein accessions with Tat pathway protein signal or twin-arginine translocation pathway in their annotation. \*\* Indicates proteins that were identified in dataset S2.

| Accession                    | Organism                              |
|------------------------------|---------------------------------------|
| WP_043259400.1               | <i>Streptomyces hokutonensis</i>      |
| WP_043435093.1               | <i>Streptomyces pluripotens</i>       |
| WP_006380203.1               | <i>Streptomyces turgidiscabies</i>    |
| WP_037801963.1               | <i>Streptomyces</i> sp. LaPpAH-108    |
| WP_053849945.1               | <i>Streptomyces</i> sp. NRRL B-24085  |
| WP_029393839.1               | <i>Streptomyces</i> sp. TOR3209       |
| WP_040902940.1               | <i>Streptomyces chartreusis</i>       |
| WP_015655752.1               | <i>Streptomyces davawensis</i>        |
| WP_039830567.1               | <i>Streptomyces</i>                   |
| WP_037666917.1               |                                       |
| WP_014676716.1               | <i>Streptomyces hygrosopicus</i>      |
| WP_026151595.1               | <i>Streptomyces prunicolor</i>        |
| WP_007386666.1               | <i>Streptomyces sviceus</i>           |
| WP_003994962.1               | <i>Streptomyces viridochromogenes</i> |
| WP_037885301.1               |                                       |
| WP_043733548.1               | <i>Streptomyces zinciresistens</i>    |
| WP_086565138.1 <sup>#</sup>  | <i>Streptomyces africanus</i>         |
| WP_079047754.1 <sup>#</sup>  | <i>Streptomyces cyanoalbus</i>        |
| WP_086855524.1 <sup>#</sup>  | <i>Streptomyces daghestanicus</i>     |
| WP_075028213.1 <sup>#</sup>  | <i>Streptomyces mirabilis</i>         |
| WP_070389912.1 <sup>#</sup>  | <i>Streptomyces pactum</i>            |
| WP_079040672.1 <sup>#</sup>  | <i>Streptomyces prasinus</i>          |
| WP_078878315.1 <sup>#</sup>  | <i>Streptomyces</i>                   |
| WP_073890878.1 <sup>#</sup>  | <i>Streptomyces</i> sp. CB01883       |
| WP_073934166.1 <sup>#</sup>  | <i>Streptomyces</i> sp. CB02400       |
| WP_073728708.1 <sup>#</sup>  | <i>Streptomyces</i> sp. CB02414       |
| WP_087804880.1 <sup>#</sup>  | <i>Streptomyces</i> sp. CS113         |
| WP_087788440.1 <sup>#</sup>  | <i>Streptomyces</i> sp. CS159         |
| WP_079308928.1 <sup>#</sup>  | <i>Streptomyces</i> sp. GKU 895       |
| WP_079130289.1 <sup>#</sup>  | <i>Streptomyces</i> sp. H-KF8         |
| WP_076082650.1 <sup>#</sup>  | <i>Streptomyces</i> sp. IMTB 2501     |
| WP_077797205.1 <sup>#</sup>  | <i>Streptomyces</i> sp. JHA26         |
| WP_076972742.1 <sup>#</sup>  | <i>Streptomyces</i> sp. M1013         |
| WP_081220707.1 <sup>#</sup>  | <i>Streptomyces</i> sp. M41(2017)     |
| WP_071381920.1 <sup>#</sup>  | <i>Streptomyces</i> sp. MUSC 1        |
| WP_071371441.1 <sup>#</sup>  | <i>Streptomyces</i> sp. MUSC 14       |
| WP_086602166.1 <sup>#</sup>  | <i>Streptomyces swartbergensis</i>    |
| WP_086698134.1 <sup>#</sup>  | <i>Streptomyces tricolor</i>          |
| WP_086867759.1 <sup>#</sup>  | <i>Streptomyces viridochromogenes</i> |
| WP_081238835.1 <sup>#</sup>  | <i>Streptomyces viridosporus</i>      |
| WP_016699903.1 <sup>**</sup> | <i>Actinoalloteichus spitiensis</i>   |
| WP_058266926.1 <sup>**</sup> | <i>Arthrobacter enclensis</i>         |
| WP_016325237.1 <sup>**</sup> | <i>Streptomyces lividans</i>          |

Table S6. Protein accessions for proteins of the S1 peptidase family. Accessions marked # were annotated as serine protease in dataset S1 but were assigned as S1 peptidase based on current annotation; \*\* indicates proteins that were identified in dataset S2.

.



|                |                                                       |
|----------------|-------------------------------------------------------|
| WP_027241321.1 | <i>Pseudophaeobacter arcticus</i>                     |
| WP_049167940.1 | <i>Corynebacterium propinquum</i>                     |
| WP_049150213.1 |                                                       |
| WP_075811183.1 | <i>Corynebacterium</i> sp. CNJ-954                    |
| WP_064834573.1 | <i>Corynebacterium</i> sp. EPI-003-04-2554_SCH2473622 |
| WP_006821438.1 | <i>Corynebacterium casei</i>                          |
| WP_038546560.1 | <i>Corynebacterium glyciniphilum</i>                  |
| WP_027017577.1 | <i>Corynebacterium pseudodiphtheriticum</i>           |
| WP_043687850.1 | <i>Nocardia abscessus</i>                             |
| WP_039795807.1 | <i>Nocardia araoensis</i>                             |
| WP_014981882.1 | <i>Nocardia brasiliensis</i>                          |
| WP_036533687.1 | <i>Nocardia cyriacigeorgica</i>                       |
| WP_040865004.1 | <i>Nocardia exalbida</i>                              |
| WP_022597221.1 | <i>Rhodococcus hoagii</i>                             |
| WP_005518562.1 |                                                       |
| WP_013416807.1 |                                                       |
| WP_064076622.1 |                                                       |
| WP_013416807.1 | <i>Rhodococcus equi</i>                               |
| WP_069856650.1 | <i>Rhodococcus</i>                                    |
| WP_051901016.1 | <i>Streptomyces aureus</i>                            |
| WP_010987315.1 | <i>Streptomyces avermitilis</i>                       |
| WP_059415102.1 | <i>Streptomyces azureus</i>                           |
| WP_086765287.1 | <i>Streptomyces bobili</i>                            |
| WP_066996028.1 | <i>Streptomyces cellostaticus</i>                     |
| WP_086838583.1 | <i>Streptomyces daghestanicus</i>                     |
| WP_030597466.1 | <i>Streptomyces fulvoviolaceus</i>                    |
| WP_071657364.1 | <i>Streptomyces gilvigriseus</i>                      |
| WP_067299969.1 | <i>Streptomyces griseochromogenes</i>                 |
| WP_078967395.1 | <i>Streptomyces griseofuscus</i>                      |
| WP_037656023.1 |                                                       |
| WP_085566213.1 |                                                       |
| WP_085568484.1 |                                                       |
| WP_037702946.1 | <i>Streptomyces lavenduligriseus</i>                  |
| WP_046417906.1 | <i>Streptomyces malaysiense</i>                       |
| WP_075026534.1 | <i>Streptomyces mirabilis</i>                         |
| WP_079172327.1 | <i>Streptomyces</i>                                   |
| WP_031119869.1 |                                                       |
| WP_039657545.1 |                                                       |
| WP_051707667.1 |                                                       |
| WP_030994093.1 |                                                       |
| WP_086806635.1 | <i>Streptomyces murinus</i>                           |
| WP_052454075.1 | <i>Streptomyces nodosus</i>                           |
| WP_079064839.1 | <i>Streptomyces olivochromogenes</i>                  |
| WP_079101010.1 | <i>Streptomyces pathocidini</i>                       |
| WP_069779106.1 | <i>Streptomyces puniscabiei</i>                       |
| WP_079161659.1 |                                                       |
| WP_079161534.1 |                                                       |
| WP_062702374.1 | <i>Streptomyces regalis</i>                           |
| WP_059249036.1 | <i>Streptomyces reticuli</i>                          |
| WP_059252215.1 |                                                       |
| WP_078629026.1 | <i>Streptomyces</i> sp. 142MFCol3.1                   |
| WP_079662723.1 | <i>Streptomyces</i> sp. 3124.6                        |

|                  |                                       |
|------------------|---------------------------------------|
| WP_019981628.1   | <i>Streptomyces</i> sp. Amel2xE9      |
| WP_081546686.1   | <i>Streptomyces</i> sp. B9173         |
| WP_079192310.1   | <i>Streptomyces</i> sp. CB01883       |
| WP_043261201.1   | <i>Streptomyces</i> sp. e14           |
| WP_067039987.1   | <i>Streptomyces</i> sp. FXJ1.172      |
| WP_037801489.1   | <i>Streptomyces</i> sp. LaPpAH-108    |
| WP_081216934.1   | <i>Streptomyces</i> sp. M41(2017)     |
| WP_053657310.1   | <i>Streptomyces</i> sp. MMG1121       |
| WP_079168661.1   | <i>Streptomyces</i> sp. MUSC 93       |
| WP_078890368.1   | <i>Streptomyces</i> sp. NBRC 110468   |
| WP_053707807.1   | <i>Streptomyces</i> sp. NRRL B-3648   |
| WP_079050130.1   | <i>Streptomyces</i> sp. NRRL F-5122   |
| WP_033281943.1   | <i>Streptomyces</i> sp. NRRL F-525    |
| WP_030345652.1   | <i>Streptomyces</i> sp. NRRL S-1022   |
| WP_037861009.1   | <i>Streptomyces</i> sp. NRRL S-340    |
| WP_030842128.1   | <i>Streptomyces</i> sp. NRRL S-475    |
| WP_030228728.1   | <i>Streptomyces</i> sp. NRRL WC-3626  |
| WP_057600964.1   | <i>Streptomyces</i> sp. Root1310      |
| WP_079041571.1   | <i>Streptomyces</i> sp. Root264       |
| WP_046261706.1   | <i>Streptomyces</i> sp. WM6386        |
| WP_086697472.1   | <i>Streptomyces tricolor</i>          |
| WP_053196823.1   | <i>Streptomyces viridochromogenes</i> |
| WP_048587024.1   | <i>Streptomyces viridochromogenes</i> |
| WP_067119775.1   | <i>Streptomyces yokosukanensis</i>    |
| WP_051754093.1   | <i>Streptomyces achromogenes</i>      |
| WP_020273774.1   | <i>Streptomyces afghaniensis</i>      |
| WP_054230871.1   | <i>Actinobacteria bacterium</i> OK006 |
| WP_054220105.1   | <i>Actinobacteria bacterium</i> OK074 |
| WP_054238031.1   | <i>Actinobacteria bacterium</i> OV320 |
| WP_018121428.1** | <i>Corynebacterium propinquum</i>     |
| WP_023019056.1** | <i>Corynebacterium</i>                |

Table S7. Protein accessions for proteins annotated as D-alanyl-D-alanine carboxypeptidase.

\*\* Indicates proteins that were identified in dataset S2.

>WP\_051901016.1 serine hydrolase [Streptomyces aureus]  
MRDSSGLSRRRAALGLAAALPLAAATATTADATSTIGGERLARAGIQVSGASGLPKHLTARSWLVADLTSG  
EVLASYNHLRLPASTLKMLFADAVLKKFERTETKYKVVADLADVPAGSSLVGVKPGITYTVHQLWQGV  
FLRSGNDAVHVL SHMNGGLPATVAEMQALAKDLQALDTHVVS PDGFDHKGQLSSAYDLTLFARHGLADAD  
FRGYCSTKTADFPAGGKKTFFQIQNTDRLLTGAWGVKPYEGLIGVKNGYTS HAGNTFTGAATRDGRTLLVT  
VMHPKSGSGVYEETAQLLDWGF GKGAQAQPVGTLVGPLSEQGASKAPTSAAKAAAAGAPASAGAAKSDGA  
PWGLVGGAGAAVALLAGGALALRRRRRAAGEASEPVD AVEEGAAEPSEAKGRRRRR

>WP\_078967395.1 serine hydrolase [Streptomyces griseofuscus]  
MRESTRLSRRAVLGLTAAALPTS AVLPLTAAAPARAASPATAIGGERLARGGLQVDGAAAVPTKLLTARA  
WLVDGTTGEVLASFNAHQRLAPASTLKMLFADTVLKKFDRTEKYTVKDS DISVPAGSSLVGVKAGITY  
TVEQLWQGVFLRSGNDAVHVL AHMNGGI AKTVAEMQARAQDLQALDTHVVS PDGFDHPGQLSSAYDLTLF  
ARHGLADPDFRGYCGTRIANFPAGGKKTFFQIQNTDRLLTGAWGLKTYDGLIGVKNGYTS HAGNTFTGAAT  
RDGRTLLVTVMHPATGSNAVYEQTAAALLDWGFTHGRTARPVGALVKPLSEGGAAA SPAPAGGQAPAGAPA  
KGPSAARLVEGAAGTAALLAAAGGFLLRRRRRAVEAREAPGDHRPPAPRAAEPDPQEPPAPTDPSGGGRH  
RR

>WP\_086806635.1 D-alanyl-D-alanine carboxypeptidase [Streptomyces murinus]  
MPAPKNTARRSL LISAATLLSLAVTAPAALAAPAAGKAPAATPPAHMSTLGGARLGLPGTQVNLAPGVPV  
LPKDLTARSWIVSDAQSGEVLASHNAHWALPPASTMKMLFADTLLPRFPRTTEHKVAAKDLAGMGESSV  
VGIKPGKTYSVHDLWLGVFLRSGNDAVHVL SAMNGGVAQTVQDMQHHADELQALDTHVVS PDGYDEPHQV  
SSAYDLTLVARSGLQKKDFRDY CSTVSADFGGQEIRNTNRLLSGD TDVPVYQGIAGVKNGNTTHAGATFT  
GVAQRGKQVLLVTVMNPQKQEHNEVYKETAKLFDWGFQAAGKVEPVGELVPPRGAAQTGTAPSGSPQASA  
PAGRAGSKPVAAAATGSRGIGTALAVAGGLLVLLAGGVFLVNRWPLPDLMRRRPRA

>WP\_079064839.1 D-alanyl-D-alanine carboxypeptidase [Streptomyces  
olivochromogenes]  
MRDSSPVPPRAAQLSRRRAALGLAAAVPLAAASPASAA TPVIGGERLARAGVQVGAAAGLPKRLTARSWLV  
ADHQSGEVLASYHAHHLAPASTLKMLFADTVLKNFERTERHRVTDADLADIPAGSSMVGVKPGITYTVE  
QLWLGVFLRSGNDAVHVL SHMNGGLARTVAQMQAQDLQALDTHVVS PDGFDHKGQVSSAYDLTLFARH  
GLADADFRAYCHTKTANFPAGGKKTFFQIQNTDRLLTGAWGVPTYDGLIGVKNGYTSNAGNTFTGAATRGG  
RTLLVTVMHPKSGSGVYEETAALLDWGFKEGAKARSVGTLVDPLSEGGASAAPTRKAARAAAGAPAAAA  
DGGGSSSWGLVGGAGGAVALLAGGAYAWRRRRRVAGDEAPDGRQERHDGQDRRDGRDRRDGRDRRDGQER  
QERHQG

>WP\_053707807.1 D-alanyl-D-alanine carboxypeptidase [Streptomyces sp. NRRL  
B-3648]  
MPAPKTTGRRSLLVTSATLLSLTVTAPAALAAQAPSPSPTATPPAGMSTLGGARLGQPGTQVNLAPGVPV  
LPKELTARSWIVSDAESGEVLAAHNAHWRLPASTLKMLFADTVLPRFPKGT LHKVAPSDLKMGAGSSV  
VGIKEGGTYSVHDLWLGVFLRSGNDAVHVL SAMNGGVAQTVQDMQDHAEELQALDTHVVS PDGYDAPEQV  
SSAYDLTLFARSGLQKRDFRDY CSTVSATFGSTEIRNTNRLLSGDS DVPVYPGIAGVKNGNTTHAGATFT  
GVAERGGKVLLVTVMNPEKHEHNEVYKETAKLLDWGFQAAGKVEPVGELVPPRSAATAQPDPSASAGRDA  
AQAAGRAAGRSGTGGPGVKAAASATTPSGTSGAGIALAVAGGLLALLGGGAFLVNRWPLPDLMRRRAR  
P

>WP\_067119775.1 D-alanyl-D-alanine carboxypeptidase [Streptomyces  
yokosukanensis]  
MPAPKPTGRRSLLVTSATLLSLSATAPAALAAPPPGASPTATPPARMSTVGGERLGQPGTQVNLAPGVPV  
LPKDITARSWIVTDAESGDVLAAHNAHWQLPASTLKMLFADTLLPRFPRTMEHKVVPSDLAGMGVSSV  
VGIKEGRTYNVRDLWLGVFLRSGNDAVHVL SAMNDGVAQTVKDMQAHAEELQARDTHVISPDGYDAPGQV  
SSAYDLSLIARSGLQKKDFRDY CSTVHAKFGDAEIQNTNRLLSGDADVPVYQGIAGVKNGNTTNAGATFT  
GVAERNRVLVTAMNPEKHDHNEVYKETAKLFDWGFRAAGKVNVPV GELVPPKSALPSPGASASAGQSAG  
PHGSGSKPVADATAESGSGGVGIAAAIAGGVLLVLLAGGVFLINRRWPLPDLMRRRP RP

>CAB89066.1 putative D-alanyl-D-alanine carboxypeptidase [Streptomyces  
coelicolor A3(2)]  
MPAPKKALRRSLTVTSAALTALALLSPAALAAPSPSTSPSATPPASMSGVGGARLGKPGTQVDLAGGAPV  
LPKDLTARSWIVADAESGDVLAAHNAHWELAPASTLKMLFADTLLPKWPKTTKRKVQVSDLAGIGSGSSM  
VGIIKEEETYTVHDLWLGVFLRSGNDAVHVL SAMNDGVEKTVADMNAHAKELQAGDTTVVSPDGYDMPGQV  
SSAYDLTLFARSLQKKDFREYASTVRAKFPGETKKDKKGKTSREPFEIQNTNRLLAGDADVEVYPGIAG  
VKNGYTTNAGNTFTGVAEQGGKVLVTVMHPAEDKHNEVYKETARLFDWGFRAAGKVRPVGELVRPRSAT  
AASP SAEASGEAGGTGKGGAGTKPVAGAAAGDGAGGAGVAAGIAAGVLALLAGGAFLINRKWPLPDLVRR  
RTRP

| Accession        | Organism                                                      | Comments/further analysis                                                                                                                                                                                |
|------------------|---------------------------------------------------------------|----------------------------------------------------------------------------------------------------------------------------------------------------------------------------------------------------------|
| WP_034515529.1   | <i>Actinomyces slackii</i>                                    | Choice-of-anchor L domain-containing protein. Predicted to be a Sec signal peptide by SignalP 6.0                                                                                                        |
| WP_023019151.1   | <i>Corynebacterium</i>                                        | LPXTG cell wall anchor domain-containing protein. Predicted to be a Sec signal peptide by SignalP 6.0. RR not conserved across closely related protein sequences                                         |
| WP_016464758.1   | <i>Microbacterium</i> sp. oral taxon 186                      | Tyrosine protein phosphatase. Misannotated previously                                                                                                                                                    |
| WP_051814589.1   | <i>Streptomyces iakyrus</i>                                   | LPXTG cell wall anchor domain-containing protein. Potentially wrong start codon assigned in this accession. RR not conserved.                                                                            |
| WP_046502582.1   | <i>Streptomyces</i> sp. NRRL B-24891                          | LAETG motif-containing sortase-dependent surface protein. This particular accession predicted to be Tat dependent by SignalP 6.0, although the RR not conserved across closely related protein sequences |
| WP_010637519.1   | <i>Streptomyces</i> sp. S4                                    | HtaA domain-containing protein, partial. This particular accession predicted to be Tat dependent by SignalP 6.0. Lots of closely related/identical proteins by Blast.                                    |
| WP_015611441.1   | <i>Streptomyces fulvissimus</i>                               | LPXTG cell wall anchor domain-containing protein. Strongly predicted Tat dependent by SignalP 6.0. RR motif not always conserved                                                                         |
| WP_051840821.1   | <i>Streptomyces lavendulae</i>                                | Annotated as LPXTG in dataset S1 but current annotation indicates it is an LAETG motif-containing sortase-dependent surface protein. The RR motif not conserved across close homologues                  |
| WP_013151425.1   | <i>Nocardiopsis dassonvillei</i>                              | LPXTG cell wall anchor domain-containing protein. The RR motif is not conserved across homologous proteins                                                                                               |
| WP_016115629.1   | <i>Bacillus cereus</i>                                        | M4 family metallopeptidase. The RR motif not conserved across close homologues                                                                                                                           |
| WP_016133109.1   | <i>Bacillus cereus</i>                                        | M4 family metallopeptidase. Identical protein to WP_016115629.1                                                                                                                                          |
| WP_007790986.1   | <i>Peptostreptococcus stomatis</i>                            | Ig-like domain-containing protein. This bacterium lacks <i>tatA</i> or <i>tatC</i> genes so cannot be a Tat substrate                                                                                    |
| WP_067783620.1** | <i>Actinomyces vulturis</i>                                   | LPXTG cell wall anchor domain-containing protein. Strongly predicted to be Tat dependent by SignalP 6.0. Very few related proteins, RR not conserved.                                                    |
| WP_034625822.1** | <i>Cellulomonas cellasea</i>                                  | LPXTG cell wall anchor domain-containing protein. Weak prediction for Tat dependence by SignalP 6.0. Homologues generally also have paired Arg but also with weak prediction for Tat dependence          |
| WP_087509670.1** | <i>Cellulomonas iranensis</i>                                 | LPXTG cell wall anchor domain-containing protein. Strong prediction for Tat dependence. twin-arginine reasonably well conserved across homologous proteins                                               |
| WP_070320500.1** | <i>Cellulomonas iranensis</i> NBRC 101100                     | LPXTG cell wall anchor domain-containing protein. Very close homologue of WP_087509670.1                                                                                                                 |
| WP_046529179.1** | <i>Cellulomonas</i> sp. FA1                                   | LPXTG cell wall anchor domain-containing protein. Very close homologue of WP_087509670.1                                                                                                                 |
| WP_005209628.1** | <i>Clostridium celatum</i> DSM 1785                           | LPXTG cell wall anchor domain-containing protein. Not recognised as a Tat signal peptide by SignalP 6.0. Very few homologues                                                                             |
| WP_087014056.1** | <i>Leucobacter</i> sp. 7(1)                                   | SpaH/EbpB family LPXTG-anchored major pilin. Close homologues predicted to be Sec dependent                                                                                                              |
| WP_057873001.1** | <i>Loigolactobacillus rennini</i> DSM 20253                   | LPXTG cell wall anchor domain-containing protein. This bacterium lacks <i>tatA</i> or <i>tatC</i> genes so cannot be a Tat substrate                                                                     |
| WP_049350406.1** | <i>Rothia mucilaginosa</i>                                    | LPXTG cell wall anchor domain-containing protein. The RR motif not conserved across close homologues                                                                                                     |
| WP_037602190.1** | <i>Streptacidiphilus rugosus</i> AM-16                        | LPXTG cell wall anchor domain-containing protein. Partial conservation of RR motif in homologous proteins                                                                                                |
| WP_037580257.1** | <i>Streptococcus equi</i> subsp. <i>ruminatorum</i> CECT 5772 | LPXTG cell wall anchor domain-containing protein. This bacterium lacks <i>tatA</i> or <i>tatC</i> genes so cannot be a Tat substrate                                                                     |
| WP_060178439.1** | <i>Streptomyces</i> sp. IMTB 1903                             | LPXTG cell wall anchor domain-containing protein. RR motif well conserved across homologous proteins                                                                                                     |

|                  |                                                               |                                                                                                                          |
|------------------|---------------------------------------------------------------|--------------------------------------------------------------------------------------------------------------------------|
| WP_030231344.1** | <i>Streptomyces</i> sp. NRRL S-350                            | LPXTG cell wall anchor domain-containing protein. RR motif not conserved across homologous proteins                      |
| WP_018509850.1** | <i>Streptomyces</i> sp. SID5594                               | LPXTG cell wall anchor domain-containing protein. RR motif well conserved across homologous proteins                     |
| WP_046259605.1** | <i>Streptomyces</i> sp. WM6386                                | LPXTG cell wall anchor domain-containing protein. RR motif well conserved across homologous proteins                     |
| WP_086778847.1   | <i>Streptomyces fimicarius</i>                                | Annotated as a peptidase in dataset 1 but current annotation is LAETG motif-containing sortase-dependent surface protein |
| WP_076967992.1   | <i>Streptomyces</i> sp. IB2014 011-1                          | Annotated as a peptidase in dataset 1 but current annotation is LAETG motif-containing sortase-dependent surface protein |
| WP_030568954.1   | <i>Streptomyces cyaneofuscatus</i>                            | Annotated as a peptidase in dataset 1 but current annotation is LAETG motif-containing sortase-dependent surface protein |
| WP_084749454.1   | <i>Streptomyces albolongus</i>                                | Annotated as a peptidase in dataset 1 but current annotation is LAETG motif-containing sortase-dependent surface protein |
| WP_032758621.1   | <i>Streptomyces albobiviridis</i>                             | Annotated as a peptidase in dataset 1 but current annotation is LAETG motif-containing sortase-dependent surface protein |
| WP_031122887.1   | <i>Streptomyces</i> sp. NRRL S-623                            | Annotated as a peptidase in dataset 1 but current annotation is LAETG motif-containing sortase-dependent surface protein |
| WP_055558699.1   | <i>Streptomyces luridiscabiei</i>                             | Annotated as a peptidase in dataset 1 but current annotation is LAETG motif-containing sortase-dependent surface protein |
| WP_070013327.1** | <i>Streptomyces abyssalis</i>                                 | SCO1860 family LAETG-anchored protein                                                                                    |
| WP_004943253.1** | <i>Streptomyces mobaraensis</i> NBRC 13819                    | SCO1860 family LAETG-anchored protein                                                                                    |
| WP_070014799.1** | <i>Streptomyces nanshensis</i>                                | SCO1860 family LAETG-anchored protein                                                                                    |
| WP_064073155.1** | <i>Streptomyces noursei</i>                                   | SCO1860 family LAETG-anchored protein                                                                                    |
| WP_055573436.1** | <i>Streptomyces prasinopilosus</i> CGMCC 4.3504               | SCO1860 family LAETG-anchored protein                                                                                    |
| WP_055694013.1** | <i>Streptomyces prasinopilosus</i> NRRL B-2711                | SCO1860 family LAETG-anchored protein                                                                                    |
| WP_055606274.1** | <i>Streptomyces prasinus</i> ATCC 13879                       | SCO1860 family LAETG-anchored protein                                                                                    |
| WP_055688174.1** | <i>Streptomyces prasinus</i> NRRL B-2712                      | SCO1860 family LAETG-anchored protein                                                                                    |
| WP_073752756.1** | <i>Streptomyces</i> sp. CB03234                               | SCO1860 family LAETG-anchored protein                                                                                    |
| WP_065002969.1** | <i>Streptomyces</i> sp. H-KF8                                 | SCO1860 family LAETG-anchored protein                                                                                    |
| WP_030791129.1** | <i>Streptomyces</i> sp. NRRL S-920                            | SCO1860 family LAETG-anchored protein                                                                                    |
| WP_078852820.1** | <i>Streptomyces</i> sp. NRRL S-1824                           | SCO1860 family LAETG-anchored protein                                                                                    |
| WP_069464636.1** | <i>Actinacidiphila rubida</i>                                 | LAETG motif-containing sortase-dependent surface protein. RR motif not conserved across homologous proteins              |
| WP_030079189.1** | <i>Streptomyces baarnensis</i>                                | LAETG motif-containing sortase-dependent surface protein. RR motif not conserved across homologous proteins              |
| WP_044384405.1** | <i>Streptomyces cyaneogriseus</i> subsp. <i>noncyanogenus</i> | LAETG motif-containing sortase-dependent surface protein. RR in wrong position relative to h-region                      |
| WP_029385521.1** | <i>Streptomyces leeuwenhoekii</i> C34                         | LAETG motif-containing sortase-dependent surface protein. Almost identical to WP_044384405.1                             |
| WP_048572334.1** | <i>Streptomyces leeuwenhoekii</i> C58                         | LAETG motif-containing sortase-dependent surface protein. Almost identical to WP_044384405.1                             |
| WP_059130410.1** | <i>Streptomyces</i> sp. NRRL F-5122                           | LAETG motif-containing sortase-dependent surface protein. RR motif not conserved across homologous proteins              |
| WP_053642605.1** | <i>Streptomyces</i> sp. NRRL F-6491                           | LAETG motif-containing sortase-dependent surface protein. RR motif not conserved across homologous proteins              |

Table S8. Protein accessions with LPXTG or LAETG in their annotation. \*\* indicates the proteins were identified in dataset S2.
