# Supplementary material
Source: publisher figshare collection journal article supplement (https://microbiology.figshare.com/articles/dataset/_/24523900)
Supplement: Supplementary file 2 [file 1]

## Dataset S2

|                |                                                          |
|----------------|----------------------------------------------------------|
| WP_048847868.1 | hypothetical protein                                     |
| WP_086613831.1 | hypothetical protein                                     |
| WP_006226706.1 | hypothetical protein                                     |
| WP_088590309.1 | hypothetical protein                                     |
| WP_081322336.1 | cytochrome c-type biogenesis protein CcmH                |
| WP_080969392.1 | cytochrome c-type biogenesis protein CcmH                |
| WP_080982266.1 | cytochrome c-type biogenesis protein CcmH                |
| WP_081247826.1 | cytochrome c-type biogenesis protein CcmH                |
| WP_029313089.1 | DUF302 domain-containing protein                         |
| WP_073494280.1 | terpene cyclase/mutase family protein                    |
| WP_069464636.1 | LAETG motif-containing sortase-dependent surface protein |
| WP_037906505.1 | terpene cyclase/mutase family protein                    |
| WP_026419747.1 | Ig-like domain-containing protein                        |
| WP_016699903.1 | S1 family peptidase                                      |
| WP_075978649.1 | choice-of-anchor P family protein                        |
| WP_026421352.1 | choice-of-anchor P family protein                        |
| WP_067818420.1 | hypothetical protein                                     |
| WP_026410447.1 | hypothetical protein                                     |
| WP_073453776.1 | GDSL-type esterase/lipase family protein                 |
| WP_058237475.1 | HAD family hydrolase                                     |
| WP_021607699.1 | CshA/CshB family fibrillar adhesin-related protein       |
| WP_021608244.1 | CshA/CshB family fibrillar adhesin-related protein       |
| WP_008733546.1 | hypothetical protein                                     |
| WP_043534360.1 | hypothetical protein                                     |
| WP_067940768.1 | hypothetical protein                                     |
| WP_070725291.1 | HAD family hydrolase                                     |
| WP_050793000.1 | hypothetical protein                                     |
| WP_009213069.1 | VWA domain-containing protein                            |
| WP_009409131.1 | hypothetical protein                                     |
| WP_009233255.1 | CshA/CshB family fibrillar adhesin-related protein       |
| WP_017177339.1 | hypothetical protein                                     |
| WP_067783620.1 | LPXTG cell wall anchor domain-containing protein         |
| WP_018334839.1 | hypothetical protein                                     |
| WP_014445984.1 | hypothetical protein                                     |
| WP_067500999.1 | DUF1775 domain-containing protein                        |
| WP_043530441.1 | hypothetical protein                                     |
| WP_034263843.1 | hypothetical protein                                     |
| WP_016442126.1 | DUF11 domain-containing protein                          |
| WP_063387033.1 | lamin tail domain-containing protein                     |
| WP_019144452.1 | HAD family hydrolase                                     |
| WP_087622105.1 | lamin tail domain-containing protein                     |
| WP_019196192.1 | GumC family protein                                      |



|                |                                                         |
|----------------|---------------------------------------------------------|
| WP_044442522.1 | Ig-like domain-containing protein                       |
| WP_078713100.1 | Ig-like domain-containing protein                       |
| WP_055942116.1 | hypothetical protein                                    |
| WP_086459789.1 | RICIN domain-containing protein                         |
| WP_082462074.1 | DUF4349 domain-containing protein                       |
| WP_067945834.1 | DUF4349 domain-containing protein                       |
| WP_082600622.1 | DUF11 domain-containing protein                         |
| WP_022892658.1 | hypothetical protein                                    |
| WP_063508475.1 | SURF1 family protein                                    |
| WP_062817430.1 | SURF1 family protein                                    |
| WP_018698701.1 | TIGR02186 family protein                                |
| WP_072476476.1 | hypothetical protein                                    |
| WP_086837935.1 | hypothetical protein                                    |
| WP_013229737.1 | hypothetical protein                                    |
| WP_065912755.1 | hypothetical protein                                    |
| WP_043786267.1 | hypothetical protein                                    |
| WP_033261304.1 | hypothetical protein                                    |
| WP_012632768.1 | DUF4091 domain-containing protein                       |
| WP_011985708.1 | DUF4091 domain-containing protein                       |
| WP_012525440.1 | DUF4091 domain-containing protein                       |
| WP_059439524.1 | DUF4091 domain-containing protein                       |
| WP_035022923.1 | hypothetical protein                                    |
| WP_087075781.1 | hypothetical protein                                    |
| WP_062285750.1 | family 20 glycosylhydrolase                             |
| WP_081709824.1 | endo-alpha-N-acetylgalactosaminidase family protein     |
| WP_055769734.1 | hypothetical protein                                    |
| WP_083706190.1 | copper resistance protein CopC                          |
| WP_083266569.1 | ice-binding family protein                              |
| WP_066212419.1 | hypothetical protein                                    |
| WP_066304274.1 | C1 family peptidase                                     |
| WP_048884997.1 | MotA/TolQ/ExbB proton channel family protein            |
| WP_047093296.1 | serine hydrolase domain-containing protein              |
| WP_055888441.1 | TIGR02186 family protein                                |
| WP_017366477.1 | hypothetical protein                                    |
| WP_002198638.1 | hypothetical protein                                    |
| WP_057772245.1 | cytochrome c-type biogenesis protein CcmH               |
| WP_015592261.1 | hypothetical protein                                    |
| WP_000248334.1 | hypothetical protein                                    |
| WP_085346658.1 | endo-1,4-beta-xylanase                                  |
| WP_055427006.1 | transporter substrate-binding domain-containing protein |
| WP_052826618.1 | hypothetical protein                                    |
| WP_080788544.1 | endo-1,4-beta-xylanase                                  |
| WP_033501893.1 | endo-1,4-beta-xylanase                                  |
| WP_006294973.1 | Cna B-type domain-containing protein                    |



|                |                                                    |
|----------------|----------------------------------------------------|
| WP_081277489.1 | type II secretion system F family protein          |
| WP_033496003.1 | metallophosphoesterase                             |
| WP_082617556.1 | DUF1134 domain-containing protein                  |
| WP_054144656.1 | DUF1134 domain-containing protein                  |
| WP_069879344.1 | DsrE family protein                                |
| WP_082540354.1 | DsbA family protein                                |
| WP_038359302.1 | DUF1134 domain-containing protein                  |
| WP_055729429.1 | DUF1134 domain-containing protein                  |
| WP_071164834.1 | SpaA isopeptide-forming pilin-related protein      |
| WP_070500937.1 | DUF2330 domain-containing protein                  |
| WP_076808965.1 | hypothetical protein                               |
| WP_027521434.1 | SURF1 family cytochrome oxidase biogenesis protein |
| WP_061024826.1 | hypothetical protein                               |
| WP_063250685.1 | choice-of-anchor G family protein                  |
| WP_084542572.1 | VWA domain-containing protein                      |
| WP_043182909.1 | hypothetical protein                               |
| WP_011659356.1 | hypothetical protein                               |
| WP_012366622.1 | hypothetical protein                               |
| WP_006752991.1 | hypothetical protein                               |
| WP_006761406.1 | hypothetical protein                               |
| WP_059585348.1 | hypothetical protein                               |
| WP_059236981.1 | hypothetical protein                               |
| WP_059239508.1 | hypothetical protein                               |
| WP_077021267.1 | hypothetical protein                               |
| WP_034201760.1 | hypothetical protein                               |
| WP_006483583.1 | hypothetical protein                               |
| WP_048986526.1 | hypothetical protein                               |
| WP_062884514.1 | hypothetical protein                               |
| WP_050012404.1 | hypothetical protein                               |
| WP_040131189.1 | hypothetical protein                               |
| WP_060268096.1 | hypothetical protein                               |
| WP_027787499.1 | hypothetical protein                               |
| WP_027787377.1 | hypothetical protein                               |
| WP_060086226.1 | hypothetical protein                               |
| WP_059488505.1 | hypothetical protein                               |
| WP_059485162.1 | hypothetical protein                               |
| WP_059700133.1 | hypothetical protein                               |
| WP_060050342.1 | hypothetical protein                               |
| WP_059677781.1 | hypothetical protein                               |
| WP_060069881.1 | hypothetical protein                               |
| WP_060280409.1 | hypothetical protein                               |
| WP_059700302.1 | hypothetical protein                               |
| WP_059621060.1 | hypothetical protein                               |
| WP_059496097.1 | hypothetical protein                               |



|                |                                                     |
|----------------|-----------------------------------------------------|
| WP_048243592.1 | hypothetical protein                                |
| WP_059525490.1 | hypothetical protein                                |
| WP_060221786.1 | hypothetical protein                                |
| WP_060084896.1 | hypothetical protein                                |
| WP_059682727.1 | hypothetical protein                                |
| WP_059526018.1 | hypothetical protein                                |
| WP_060172271.1 | hypothetical protein                                |
| WP_059861788.1 | hypothetical protein                                |
| WP_059904810.1 | hypothetical protein                                |
| WP_060343570.1 | hypothetical protein                                |
| WP_060308855.1 | hypothetical protein                                |
| WP_059588290.1 | hypothetical protein                                |
| WP_027781201.1 | hypothetical protein                                |
| WP_041490491.1 | hypothetical protein                                |
| WP_039366460.1 | hypothetical protein                                |
| WP_046548430.1 | hypothetical protein                                |
| WP_046545623.1 | hypothetical protein                                |
| WP_071332150.1 | hypothetical protein                                |
| WP_047850963.1 | hypothetical protein                                |
| WP_046545747.1 | hypothetical protein                                |
| WP_011352018.1 | hypothetical protein                                |
| WP_069247875.1 | hypothetical protein                                |
| WP_069260495.1 | hypothetical protein                                |
| WP_006410297.1 | PepSY-associated TM helix domain-containing protein |
| WP_059479327.1 | hypothetical protein                                |
| WP_060254451.1 | hypothetical protein                                |
| WP_060299571.1 | hypothetical protein                                |
| WP_040127356.1 | hypothetical protein                                |
| WP_059514641.1 | hypothetical protein                                |
| WP_047900707.1 | hypothetical protein                                |
| WP_034180619.1 | hypothetical protein                                |
| WP_072441791.1 | hypothetical protein                                |
| WP_034189316.1 | hypothetical protein                                |
| WP_059557670.1 | hypothetical protein                                |
| WP_069617352.1 | hypothetical protein                                |
| WP_021159606.1 | hypothetical protein                                |
| WP_059588168.1 | hypothetical protein                                |
| WP_059789976.1 | DUF3999 domain-containing protein                   |
| WP_060030825.1 | DUF3999 domain-containing protein                   |
| WP_060353807.1 | DUF3999 domain-containing protein                   |
| WP_059823442.1 | DUF3999 domain-containing protein                   |
| WP_059835798.1 | DUF3999 domain-containing protein                   |
| WP_059781113.1 | DUF3999 domain-containing protein                   |
| WP_069748857.1 | hypothetical protein                                |



|                |                                                  |
|----------------|--------------------------------------------------|
| WP_069745444.1 | hypothetical protein                             |
| WP_047902623.1 | hypothetical protein                             |
| WP_059884723.1 | hypothetical protein                             |
| WP_059801629.1 | hypothetical protein                             |
| WP_060157732.1 | hypothetical protein                             |
| WP_059921586.1 | hypothetical protein                             |
| WP_060291916.1 | hypothetical protein                             |
| WP_060363596.1 | hypothetical protein                             |
| WP_059542378.1 | hypothetical protein                             |
| WP_064558476.1 | anti-virulence regulator CigR family protein     |
| WP_026488219.1 | hypothetical protein                             |
| WP_021688355.1 | SURF1 family protein                             |
| WP_014433859.1 | hypothetical protein                             |
| WP_021091342.1 | hydrogenase small subunit                        |
| WP_048669916.1 | DUF2062 domain-containing protein                |
| WP_043684137.1 | GumC family protein                              |
| WP_020521338.1 | c-type cytochrome                                |
| WP_034625822.1 | LPXTG cell wall anchor domain-containing protein |
| WP_013769889.1 | hypothetical protein                             |
| WP_048728390.1 | VWA domain-containing protein                    |
| WP_087509670.1 | LPXTG cell wall anchor domain-containing protein |
| WP_070320500.1 | LPXTG cell wall anchor domain-containing protein |
| WP_019135425.1 | Ig-like domain-containing protein                |
| WP_048341338.1 | hypothetical protein                             |
| WP_062101716.1 | Ig-like domain-containing protein                |
| WP_046529179.1 | LPXTG cell wall anchor domain-containing protein |
| WP_055919086.1 | hypothetical protein                             |
| WP_069385866.1 | cohesin domain-containing protein                |
| WP_087472132.1 | cohesin domain-containing protein                |
| WP_053370785.1 | cohesin domain-containing protein                |
| WP_047233459.1 | hypothetical protein                             |
| WP_064315323.1 | cohesin domain-containing protein                |
| WP_011910314.1 | hydrogenase small subunit                        |
| WP_014099504.1 | LEA type 2 family protein                        |
| WP_052374220.1 | hypothetical protein                             |
| WP_086521042.1 | YcnI family protein                              |
| WP_086518073.1 | YcnI family protein                              |
| WP_086515263.1 | YcnI family protein                              |
| WP_011931836.1 | YcnI family protein                              |
| WP_045526708.1 | YcnI family protein                              |
| WP_015489341.1 | YcnI family protein                              |
| WP_012300161.1 | hypothetical protein                             |
| WP_012300049.1 | YcnI family protein                              |
| WP_063072393.1 | YcnI family protein                              |



|                |                                                    |
|----------------|----------------------------------------------------|
| WP_043588079.1 | YcnI family protein                                |
| WP_087364264.1 | Wzz/FepE/Etk N-terminal domain-containing protein  |
| WP_005209628.1 | LPXTG cell wall anchor domain-containing protein   |
| WP_039249807.1 | hypothetical protein                               |
| WP_061429810.1 | hypothetical protein                               |
| WP_066550529.1 | hypothetical protein                               |
| WP_085018363.1 | DUF445 domain-containing protein                   |
| WP_085019858.1 | pentapeptide repeat-containing protein             |
| WP_072414687.1 | hypothetical protein                               |
| WP_082855643.1 | hypothetical protein                               |
| WP_075727961.1 | hypothetical protein                               |
| WP_051866792.1 | copper resistance protein CopC                     |
| WP_066523952.1 | hypothetical protein                               |
| WP_083292036.1 | DUF4185 domain-containing protein                  |
| WP_070568623.1 | DUF4185 domain-containing protein                  |
| WP_003856086.1 | exo-alpha-sialidase                                |
| WP_018023019.1 | copper resistance protein CopC                     |
| WP_006062599.1 | hypothetical protein                               |
| WP_025403387.1 | hypothetical protein                               |
| WP_075664640.1 | porin PorA family protein                          |
| WP_074508171.1 | exo-alpha-sialidase                                |
| WP_077312225.1 | exo-alpha-sialidase                                |
| WP_044027174.1 | exo-alpha-sialidase                                |
| WP_081803761.1 | S8 family serine peptidase                         |
| WP_051106395.1 | hypothetical protein                               |
| WP_051904793.1 | DUF4185 domain-containing protein                  |
| WP_080971943.1 | Rib/alpha-like domain-containing protein           |
| WP_035002726.1 | Rib/alpha-like domain-containing protein           |
| WP_051879522.1 | Rib/alpha-like domain-containing protein           |
| WP_043014821.1 | Rib/alpha-like domain-containing protein           |
| WP_035003110.1 | hypothetical protein                               |
| WP_051894060.1 | Rib/alpha-like domain-containing protein           |
| WP_051894215.1 | Rib/alpha-like domain-containing protein           |
| WP_055174723.1 | hypothetical protein                               |
| WP_047261182.1 | HtaA domain-containing protein                     |
| WP_055122566.1 | hypothetical protein                               |
| WP_066490205.1 | hypothetical protein                               |
| WP_018121428.1 | D-alanyl-D-alanine carboxypeptidase family protein |
| WP_023019056.1 | D-alanyl-D-alanine carboxypeptidase family protein |
| WP_070844356.1 | hypothetical protein                               |
| WP_070816867.1 | DUF4185 domain-containing protein                  |
| WP_070819865.1 | DUF4185 domain-containing protein                  |
| WP_070769551.1 | lamin tail domain-containing protein               |
| WP_070614106.1 | DUF4185 domain-containing protein                  |



|                |                                                                 |
|----------------|-----------------------------------------------------------------|
| WP_070508929.1 | HtaA domain-containing protein                                  |
| WP_070537220.1 | hypothetical protein                                            |
| WP_070420471.1 | HtaA domain-containing protein                                  |
| WP_070763091.1 | DUF4185 domain-containing protein                               |
| WP_070791085.1 | DUF4185 domain-containing protein                               |
| WP_083316703.1 | DUF4185 domain-containing protein                               |
| WP_070452682.1 | DUF4185 domain-containing protein                               |
| WP_070433763.1 | TIGR03773 family transporter-associated surface protein         |
| WP_070975208.1 | Rib/alpha-like domain-containing protein                        |
| WP_071573543.1 | Rib/alpha-like domain-containing protein                        |
| WP_083584111.1 | Rib/alpha-like domain-containing protein                        |
| WP_071567683.1 | Rib/alpha-like domain-containing protein                        |
| WP_070362059.1 | Rib/alpha-like domain-containing protein                        |
| WP_049151632.1 | HtaA domain-containing protein                                  |
| WP_046646201.1 | HtaA domain-containing protein                                  |
| WP_049146658.1 | HtaA domain-containing protein                                  |
| WP_049064233.1 | HtaA domain-containing protein                                  |
| WP_049160753.1 | HtaA domain-containing protein                                  |
| WP_005531760.1 | HtaA domain-containing protein                                  |
| WP_019193688.1 | HtaA domain-containing protein                                  |
| WP_054314932.1 | DUF3068 domain-containing protein                               |
| WP_052844124.1 | choice-of-anchor M domain-containing protein                    |
| WP_015202080.1 | hypothetical protein                                            |
| WP_086782709.1 | S8 family serine peptidase                                      |
| WP_084021289.1 | fibronectin type III domain-containing protein                  |
| WP_051973425.1 | DUF916 domain-containing protein                                |
| WP_073250052.1 | DUF4331 domain-containing protein                               |
| WP_059410969.1 | hypothetical protein                                            |
| WP_006159236.1 | hypothetical protein                                            |
| WP_011517311.1 | hypothetical protein                                            |
| WP_062796007.1 | hypothetical protein                                            |
| WP_011616288.1 | hypothetical protein                                            |
| WP_078198379.1 | hypothetical protein                                            |
| WP_042883642.1 | hypothetical protein                                            |
| WP_018004969.1 | hypothetical protein                                            |
| WP_063239409.1 | tripartite tricarboxylate transporter substrate binding protein |
| WP_010811364.1 | hypothetical protein                                            |
| WP_020206616.1 | hypothetical protein                                            |
| WP_029046437.1 | hypothetical protein                                            |
| WP_012354378.1 | hypothetical protein                                            |
| WP_025585582.1 | hypothetical protein                                            |
| WP_058740988.1 | hypothetical protein                                            |
| WP_058725996.1 | choice-of-anchor G family protein                               |
| WP_058729336.1 | hypothetical protein                                            |



|                |                                                                                                               |
|----------------|---------------------------------------------------------------------------------------------------------------|
| WP_058728719.1 | hypothetical protein                                                                                          |
| WP_066651479.1 | hypothetical protein                                                                                          |
| WP_070418157.1 | bifunctional UDP-sugar hydrolase/5'-nucleotidase                                                              |
| WP_056120640.1 | hypothetical protein                                                                                          |
| WP_055952736.1 | YcnI family protein                                                                                           |
| WP_071299477.1 | ExeM/NucH family extracellular endonuclease                                                                   |
| WP_065961321.1 | bifunctional UDP-sugar hydrolase/5'-nucleotidase                                                              |
| WP_071244483.1 | hypothetical protein                                                                                          |
| WP_071249110.1 | DUF11 domain-containing protein                                                                               |
| WP_071302787.1 | bifunctional UDP-sugar hydrolase/5'-nucleotidase                                                              |
| WP_071296020.1 | bifunctional UDP-sugar hydrolase/5'-nucleotidase                                                              |
| WP_066652216.1 | hypothetical protein                                                                                          |
| WP_065959450.1 | hypothetical protein                                                                                          |
| WP_027465407.1 | hypothetical protein                                                                                          |
| WP_002529663.1 | hypothetical protein                                                                                          |
| WP_088246978.1 | hypothetical protein                                                                                          |
| WP_078302060.1 | hypothetical protein                                                                                          |
| WP_062387844.1 | hypothetical protein                                                                                          |
| WP_084078503.1 | SURF1 family protein                                                                                          |
| WP_070435498.1 | 5'-nucleotidase C-terminal domain-containing protein                                                          |
| WP_028311354.1 | hypothetical protein                                                                                          |
| WP_085318242.1 | hypothetical protein                                                                                          |
| WP_051534117.1 | 4Fe-4S dicluster domain-containing protein                                                                    |
| WP_028318203.1 | 4Fe-4S dicluster domain-containing protein                                                                    |
| WP_005988823.1 | hypothetical protein                                                                                          |
| WP_028580723.1 | 4Fe-4S dicluster domain-containing protein                                                                    |
| WP_035247752.1 | 4Fe-4S dicluster domain-containing protein<br>cellulose biosynthesis cyclic di-GMP-binding regulatory protein |
| WP_084604463.1 | BcsB                                                                                                          |
| WP_066728980.1 | hydrogenase 2 operon protein HybA                                                                             |
| WP_058235133.1 | hypothetical protein                                                                                          |
| WP_020438466.1 | YaaW family protein                                                                                           |
| WP_061228443.1 | hypothetical protein                                                                                          |
| WP_007630985.1 | hypothetical protein                                                                                          |
| WP_084765547.1 | hypothetical protein                                                                                          |
| WP_025544707.1 | Gldg family protein                                                                                           |
| WP_035353858.1 | twin-arginine translocation signal domain-containing protein                                                  |
| WP_052106175.1 | hypothetical protein                                                                                          |
| WP_019238747.1 | hypothetical protein                                                                                          |
| WP_010782219.1 | DUF916 domain-containing protein                                                                              |
| WP_077151302.1 | putative mucin/carbohydrate-binding domain-containing protein                                                 |
| WP_001515206.1 | YaaW family protein                                                                                           |
| WP_028116374.1 | hypothetical protein                                                                                          |
| WP_087347104.1 | hypothetical protein                                                                                          |



|                |                                                            |
|----------------|------------------------------------------------------------|
| WP_056044687.1 | hypothetical protein                                       |
| WP_056056642.1 | right-handed parallel beta-helix repeat-containing protein |
| WP_056261770.1 | Ig-like domain-containing protein                          |
| WP_055974413.1 | Ig-like domain-containing protein                          |
| WP_056049027.1 | Ig-like domain-containing protein                          |
| WP_052505214.1 | Ig-like domain-containing protein                          |
| WP_066278535.1 | SGNH/GDSL hydrolase family protein                         |
| WP_083445970.1 | AhpA/YtjB family protein                                   |
| WP_004128748.1 | hypothetical protein                                       |
| WP_004136222.1 | hypothetical protein                                       |
| WP_026850174.1 | hypothetical protein                                       |
| WP_078784464.1 | hypothetical protein                                       |
| WP_040101249.1 | hydrogenase 2 operon protein HybA                          |
| WP_040201369.1 | hydrogenase 2 operon protein HybA                          |
| WP_072919771.1 | hypothetical protein                                       |
| WP_055764009.1 | SpaA isopeptide-forming pilin-related protein              |
| WP_042416226.1 | ABC transporter permease subunit                           |
| WP_020676593.1 | 4Fe-4S dicluster domain-containing protein                 |
| WP_062015704.1 | sugar dehydrogenase complex small subunit                  |
| WP_082785218.1 | sugar dehydrogenase complex small subunit                  |
| WP_052327572.1 | superinfection immunity protein                            |
| WP_062446384.1 | superinfection immunity protein                            |
| WP_062455509.1 | superinfection immunity protein                            |
| WP_062495313.1 | superinfection immunity protein                            |
| WP_051393048.1 | hypothetical protein                                       |
| WP_007318184.1 | HAD-IB family hydrolase                                    |
| WP_035726910.1 | YcnI family protein                                        |
| WP_026919933.1 | YcnI family protein                                        |
| WP_014361013.1 | YcnI family protein                                        |
| WP_006339621.1 | hypothetical protein                                       |
| WP_007618975.1 | HAD family hydrolase                                       |
| WP_079930690.1 | YcnI family protein                                        |
| WP_087192245.1 | hypothetical protein                                       |
| WP_026529730.1 | SpaA isopeptide-forming pilin-related protein              |
| WP_011396790.1 | hypothetical protein                                       |
| WP_004088007.1 | 4Fe-4S dicluster domain-containing protein                 |
| WP_050465065.1 | Wzz/FepE/Etk N-terminal domain-containing protein          |
| WP_053198831.1 | Wzz/FepE/Etk N-terminal domain-containing protein          |
| WP_016834044.1 | Wzz/FepE/Etk N-terminal domain-containing protein          |
| WP_050476765.1 | Wzz/FepE/Etk N-terminal domain-containing protein          |
| WP_034291961.1 | Wzz/FepE/Etk N-terminal domain-containing protein          |
| WP_066040688.1 | hypothetical protein                                       |
| WP_030450198.1 | hypothetical protein                                       |
| WP_062432348.1 | hypothetical protein                                       |



|                |                                                            |
|----------------|------------------------------------------------------------|
| WP_066361022.1 | hypothetical protein                                       |
| WP_062330275.1 | hypothetical protein                                       |
| WP_062355275.1 | hypothetical protein                                       |
| WP_022899026.1 | discoidin domain-containing protein                        |
| WP_035564895.1 | hypothetical protein                                       |
| WP_069984382.1 | DUF4397 domain-containing protein                          |
| WP_013837494.1 | hypothetical protein                                       |
| WP_038497525.1 | hypothetical protein                                       |
| WP_035821865.1 | hypothetical protein                                       |
| WP_073390660.1 | hypothetical protein                                       |
| WP_069111596.1 | DUF4349 domain-containing protein                          |
| WP_046770059.1 | DUF4349 domain-containing protein                          |
| WP_084469651.1 | DUF4349 domain-containing protein                          |
| WP_053202776.1 | DUF4349 domain-containing protein                          |
| WP_007352828.1 | hypothetical protein                                       |
| WP_033387677.1 | DUF4331 domain-containing protein                          |
| WP_054296410.1 | DUF4331 domain-containing protein                          |
| WP_054293102.1 | DUF4331 domain-containing protein                          |
| WP_042196000.1 | DUF4331 domain-containing protein                          |
| WP_041292034.1 | DUF6049 family protein                                     |
| WP_088318137.1 | hypothetical protein                                       |
| WP_033347631.1 | hypothetical protein                                       |
| WP_035847823.1 | hypothetical protein                                       |
| WP_035863006.1 | choice-of-anchor P family protein                          |
| WP_033251316.1 | DUF1775 domain-containing protein                          |
| WP_033214217.1 | hypothetical protein                                       |
| WP_014135556.1 | SCO2322 family protein                                     |
| WP_033826143.1 | hypothetical protein                                       |
| WP_057229896.1 | DUF4349 domain-containing protein                          |
| WP_063444545.1 | YaaW family protein                                        |
| WP_079574122.1 | DUF3566 domain-containing protein                          |
| WP_020392913.1 | right-handed parallel beta-helix repeat-containing protein |
| WP_007911811.1 | YncE family protein                                        |
| WP_081789339.1 | DUF4142 domain-containing protein                          |
| WP_076779723.1 | Ig-like domain-containing protein                          |
| WP_055173989.1 | pectinesterase family protein                              |
| WP_055306235.1 | pectinesterase family protein                              |
| WP_077959486.1 | hypothetical protein                                       |
| WP_049151215.1 | hypothetical protein                                       |
| WP_009310390.1 | alpha/beta hydrolase                                       |
| WP_006736993.1 | DUF2974 domain-containing protein                          |
| WP_057718161.1 | hypothetical protein                                       |
| WP_026199800.1 | hypothetical protein                                       |
| WP_003150348.1 | CHAP domain-containing protein                             |



|                |                                                   |
|----------------|---------------------------------------------------|
| WP_058527013.1 | hypothetical protein                              |
| WP_052357896.1 | S8 family serine peptidase                        |
| WP_055907020.1 | hypothetical protein                              |
| WP_030465437.1 | SdrD B-like domain-containing protein             |
| WP_045310765.1 | SdrD B-like domain-containing protein             |
| WP_030481134.1 | DUF1360 domain-containing protein                 |
| WP_004786587.1 | hypothetical protein                              |
| WP_035983057.1 | hypothetical protein                              |
| WP_002985403.1 | hypothetical protein                              |
| WP_015681490.1 | hypothetical protein                              |
| WP_083352005.1 | copper resistance protein CopC                    |
| WP_058594659.1 | copper resistance protein CopC                    |
| WP_010156067.1 | hypothetical protein                              |
| WP_017794056.1 | hypothetical protein                              |
| WP_087014056.1 | SpaH/EbpB family LPXTG-anchored major pilin       |
| WP_052961504.1 | M1 family aminopeptidase                          |
| WP_025134557.1 | hypothetical protein                              |
| WP_057878938.1 | leucine-rich repeat protein                       |
| WP_057873001.1 | LPXTG cell wall anchor domain-containing protein  |
| WP_018353464.1 | ALF repeat-containing protein                     |
| WP_058835255.1 | SURF1 family protein                              |
| WP_052595558.1 | type II secretion system F family protein         |
| WP_031371299.1 | SURF1 family protein                              |
| WP_057920519.1 | SURF1 family protein                              |
| WP_046659779.1 | SURF1 family protein                              |
| WP_036112499.1 | SURF1 family protein                              |
| WP_036194832.1 | SURF1 family protein                              |
| WP_074872556.1 | SURF1 family protein                              |
| WP_057945932.1 | SURF1 family protein                              |
| WP_055909325.1 | SURF1 family protein                              |
| WP_056178414.1 | SURF1 family protein                              |
| WP_056100861.1 | SURF1 family protein                              |
| WP_056306103.1 | SURF1 family protein                              |
| WP_057164304.1 | SURF1 family protein                              |
| WP_057161099.1 | SURF1 family protein                              |
| WP_078758809.1 | SURF1 family protein                              |
| WP_072908093.1 | 4Fe-4S dicluster domain-containing protein        |
| WP_014871804.1 | Wzz/FepE/Etk N-terminal domain-containing protein |
| WP_067213518.1 | IS4 family transposase                            |
| WP_030484094.1 | DUF4349 domain-containing protein                 |
| WP_036240134.1 | hypothetical protein                              |
| WP_069988814.1 | glycosyl hydrolase                                |
| WP_020157341.1 | hypothetical protein                              |
| WP_060849731.1 | Rieske 2Fe-2S domain-containing protein           |



|                |                                                            |
|----------------|------------------------------------------------------------|
| WP_066924169.1 | DUF4349 domain-containing protein                          |
| WP_048435058.1 | hypothetical protein                                       |
| WP_026610324.1 | hypothetical protein                                       |
| WP_052700213.1 | FAD/NAD(P)-binding oxidoreductase                          |
| WP_026598801.1 | hypothetical protein                                       |
| WP_022948069.1 | SURF1 family protein                                       |
| WP_083960596.1 | TIGR03758 family integrating conjugative element protein   |
| WP_020186848.1 | NAD(P)/FAD-dependent oxidoreductase                        |
| WP_003597644.1 | DUF1134 domain-containing protein                          |
| WP_015822348.1 | DUF1134 domain-containing protein                          |
| WP_012453627.1 | DUF1134 domain-containing protein                          |
| WP_017485181.1 | DUF1134 domain-containing protein                          |
| WP_060769419.1 | DUF1134 domain-containing protein                          |
| WP_064031969.1 | hypothetical protein                                       |
| WP_017203113.1 | YcnI family protein                                        |
| WP_064956389.1 | hypothetical protein                                       |
| WP_082334822.1 | copper resistance protein CopC                             |
| WP_076688294.1 | copper resistance protein CopC                             |
| WP_045272686.1 | hypothetical protein                                       |
| WP_045249571.1 | hypothetical protein                                       |
| WP_058232366.1 | copper resistance protein CopC                             |
| WP_079112183.1 | S8 family serine peptidase                                 |
| WP_052460806.1 | hypothetical protein                                       |
| WP_029153468.1 | HtaA domain-containing protein                             |
| WP_061782355.1 | hypothetical protein                                       |
| WP_045258722.1 | DUF4349 domain-containing protein                          |
| WP_084613500.1 | DUF5979 domain-containing protein                          |
| WP_082784215.1 | copper resistance protein CopC                             |
| WP_052226469.1 | DUF1775 domain-containing protein                          |
| WP_021198471.1 | choice-of-anchor G family protein                          |
| WP_052674706.1 | S8 family serine peptidase                                 |
| WP_045277607.1 | M1 family metallopeptidase                                 |
| WP_071919170.1 | phosphatase PAP2 family protein                            |
| WP_025103163.1 | YcnI family protein                                        |
| WP_060922111.1 | YcnI family protein                                        |
| WP_025104647.1 | S8 family serine peptidase                                 |
| WP_084344888.1 | copper resistance protein CopC                             |
| WP_083569401.1 | carboxypeptidase-like regulatory domain-containing protein |
| WP_020096836.1 | DUF1775 domain-containing protein                          |
| WP_082586491.1 | S8 family serine peptidase                                 |
| WP_018188612.1 | DUF1775 domain-containing protein                          |
| WP_088379655.1 | HtaA domain-containing protein                             |
| WP_029261182.1 | hypothetical protein                                       |
| WP_036316991.1 | hypothetical protein                                       |



|                |                                                                  |
|----------------|------------------------------------------------------------------|
| WP_082297971.1 | S8 family serine peptidase                                       |
| WP_077052164.1 | hypothetical protein                                             |
| WP_029264221.1 | carboxypeptidase regulatory-like domain-containing protein       |
| WP_029266231.1 | copper resistance protein CopC                                   |
| WP_050721264.1 | YcnI family protein                                              |
| WP_067114872.1 | DUF4349 domain-containing protein                                |
| WP_087056659.1 | YcnI family protein                                              |
| WP_071327739.1 | S8 family serine peptidase                                       |
| WP_085604923.1 | S8 family serine peptidase                                       |
| WP_055954023.1 | DUF4349 domain-containing protein                                |
| WP_082488321.1 | carboxypeptidase-like regulatory domain-containing protein       |
| WP_056375517.1 | S8 family serine peptidase                                       |
|                | alpha-L-arabinofuranosidase C-terminal domain-containing protein |
| WP_082450279.1 | protein                                                          |
| WP_082516518.1 | copper resistance protein CopC                                   |
| WP_052493031.1 | S8 family serine peptidase                                       |
| WP_054678997.1 | copper resistance protein CopC                                   |
| WP_076674855.1 | copper resistance protein CopC                                   |
| WP_076494745.1 | hypothetical protein                                             |
| WP_055866250.1 | carboxypeptidase-like regulatory domain-containing protein       |
| WP_055962946.1 | fibronectin type III domain-containing protein                   |
| WP_082524328.1 | M1 family aminopeptidase                                         |
| WP_046014689.1 | DUF6049 family protein                                           |
| WP_067162731.1 | DUF4349 domain-containing protein                                |
| WP_023953107.1 | HtaA domain-containing protein                                   |
| WP_020380574.1 | carboxypeptidase-like regulatory domain-containing protein       |
| WP_067196734.1 | choice-of-anchor G family protein                                |
| WP_047519257.1 | DUF5979 domain-containing protein                                |
| WP_016463500.1 | copper resistance protein CopC                                   |
| WP_058622210.1 | hypothetical protein                                             |
| WP_013585746.1 | hypothetical protein                                             |
| WP_002778173.1 | hypothetical protein                                             |
| WP_013286804.1 | neocarzinostatin apoprotein domain-containing protein            |
| WP_076470653.1 | hypothetical protein                                             |
| WP_074473800.1 | hypothetical protein                                             |
| WP_064445663.1 | neocarzinostatin apoprotein domain-containing protein            |
| WP_069088473.1 | neocarzinostatin apoprotein domain-containing protein            |
| WP_030499203.1 | neocarzinostatin apoprotein domain-containing protein            |
| WP_084597727.1 | DUF4349 domain-containing protein                                |
| WP_074316730.1 | DUF4349 domain-containing protein                                |
| WP_013476452.1 | neocarzinostatin apoprotein domain-containing protein            |
| WP_052503667.1 | hypothetical protein                                             |
| WP_007457857.1 | DUF6346 domain-containing protein                                |
| WP_030329257.1 | hypothetical protein                                             |



|                |                                                       |
|----------------|-------------------------------------------------------|
| WP_067359874.1 | copper resistance protein CopC                        |
| WP_073839607.1 | hypothetical protein                                  |
| WP_077936608.1 | hypothetical protein                                  |
| WP_043323399.1 | neocarzinostatin apoprotein domain-containing protein |
| WP_047890386.1 | neocarzinostatin apoprotein domain-containing protein |
| WP_073828243.1 | hypothetical protein                                  |
| WP_071094599.1 | neocarzinostatin apoprotein domain-containing protein |
| WP_083364995.1 | hypothetical protein                                  |
| WP_067184399.1 | hypothetical protein                                  |
| WP_084452563.1 | SURF1 family protein                                  |
| WP_075217005.1 | SURF1 family protein                                  |
| WP_087136771.1 | cohesin domain-containing protein                     |
| WP_087136226.1 | hypothetical protein                                  |
| WP_065015780.1 | hypothetical protein                                  |
| WP_083087896.1 | hypothetical protein                                  |
| WP_066975116.1 | hypothetical protein                                  |
| WP_067958698.1 | hypothetical protein                                  |
| WP_005063674.1 | hypothetical protein                                  |
| WP_005073213.1 | hypothetical protein                                  |
| WP_074319467.1 | hypothetical protein                                  |
| WP_052618647.1 | hypothetical protein                                  |
| WP_049231943.1 | hypothetical protein                                  |
| WP_021268995.1 | hypothetical protein                                  |
| WP_074356318.1 | hypothetical protein                                  |
| WP_074250269.1 | hypothetical protein                                  |
| WP_079642101.1 | hypothetical protein                                  |
| WP_074258304.1 | hypothetical protein                                  |
| WP_074340136.1 | hypothetical protein                                  |
| WP_074343781.1 | hypothetical protein                                  |
| WP_079583063.1 | hypothetical protein                                  |
| WP_079655361.1 | hypothetical protein                                  |
| WP_074254038.1 | hypothetical protein                                  |
| WP_074330522.1 | hypothetical protein                                  |
| WP_079668796.1 | hypothetical protein                                  |
| WP_079617725.1 | hypothetical protein                                  |
| WP_041043629.1 | hypothetical protein                                  |
| WP_030094292.1 | hypothetical protein                                  |
| WP_070949002.1 | hypothetical protein                                  |
| WP_070941957.1 | hypothetical protein                                  |
| WP_078321647.1 | hypothetical protein                                  |
| WP_046252588.1 | hypothetical protein                                  |
| WP_070936631.1 | hypothetical protein                                  |
| WP_078334177.1 | hypothetical protein                                  |
| WP_078282577.1 | hypothetical protein                                  |



|                |                                                              |
|----------------|--------------------------------------------------------------|
| WP_043079207.1 | hypothetical protein                                         |
| WP_064632136.1 | hypothetical protein                                         |
| WP_078359203.1 | DUF4349 domain-containing protein                            |
| WP_078324820.1 | hypothetical protein                                         |
| WP_070913086.1 | hypothetical protein                                         |
| WP_085130694.1 | hypothetical protein                                         |
| WP_047318566.1 | hypothetical protein                                         |
| WP_085087113.1 | hypothetical protein                                         |
| WP_065064343.1 | DUF4349 domain-containing protein                            |
| WP_064961509.1 | DUF4349 domain-containing protein                            |
| WP_064899274.1 | DUF4349 domain-containing protein                            |
| WP_085140301.1 | DUF4349 domain-containing protein                            |
| WP_076216568.1 | DUF4349 domain-containing protein                            |
| WP_047037357.1 | DUF4349 domain-containing protein                            |
| WP_036393700.1 | DUF4349 domain-containing protein                            |
| WP_083145723.1 | twin-arginine translocation signal domain-containing protein |
| WP_029136656.1 | DUF6049 family protein                                       |
| WP_072515150.1 | AarF/UbiB family protein                                     |
| WP_071894446.1 | hypothetical protein                                         |
| WP_058888770.1 | CHRD domain-containing protein                               |
| WP_036474851.1 | CHRD domain-containing protein                               |
| WP_084183403.1 | protease pro-enzyme activation domain-containing protein     |
| WP_071675328.1 | hypothetical protein                                         |
| WP_036481955.1 | SURF1 family protein                                         |
| WP_053378551.1 | carboxypeptidase-like regulatory domain-containing protein   |
| WP_043695024.1 | hypothetical protein                                         |
| WP_054811683.1 | hypothetical protein                                         |
| WP_042259183.1 | hypothetical protein                                         |
| WP_014989207.1 | hypothetical protein                                         |
| WP_029897422.1 | hypothetical protein                                         |
| WP_063055184.1 | hypothetical protein                                         |
| WP_063006426.1 | hypothetical protein                                         |
| WP_051407089.1 | hypothetical protein                                         |
| WP_056809982.1 | hypothetical protein                                         |
| WP_052314138.1 | hypothetical protein                                         |
| WP_043676971.1 | hypothetical protein                                         |
| WP_028474384.1 | DUF6049 family protein                                       |
| WP_068112638.1 | hypothetical protein                                         |
| WP_028659604.1 | hypothetical protein                                         |
| WP_082748224.1 | S8 family serine peptidase                                   |
| WP_017935992.1 | hypothetical protein                                         |
| WP_056862610.1 | hypothetical protein                                         |
| WP_056904455.1 | hypothetical protein                                         |
| WP_056749018.1 | hypothetical protein                                         |



|                |                                                              |
|----------------|--------------------------------------------------------------|
| WP_056925535.1 | hypothetical protein                                         |
| WP_061081165.1 | hypothetical protein                                         |
| WP_017557735.1 | hypothetical protein                                         |
| WP_017622416.1 | ABC transporter substrate-binding protein                    |
| WP_013155373.1 | hypothetical protein                                         |
| WP_071622919.1 | hypothetical protein                                         |
| WP_073378631.1 | prenyltransferase/squalene oxidase repeat-containing protein |
| WP_017541123.1 | ABC transporter substrate-binding protein                    |
| WP_026122751.1 | hypothetical protein                                         |
| WP_017546715.1 | hypothetical protein                                         |
| WP_020722865.1 | hypothetical protein                                         |
| WP_049577979.1 | hypothetical protein                                         |
| WP_017297372.1 | DUF4349 domain-containing protein                            |
| WP_068086363.1 | nuclear transport factor 2 family protein                    |
| WP_061552847.1 | sugar dehydrogenase complex small subunit                    |
| WP_068623584.1 | HtaA domain-containing protein                               |
| WP_068708877.1 | choice-of-anchor A family protein                            |
| WP_056644573.1 | choice-of-anchor A family protein                            |
| WP_087351888.1 | glycoside hydrolase family 3 protein                         |
| WP_087227073.1 | hypothetical protein                                         |
|                | glycoside hydrolase family 3 C-terminal domain-containing    |
| WP_077598534.1 | protein                                                      |
| WP_022921254.1 | DUF4349 domain-containing protein                            |
| WP_017719097.1 | hypothetical protein                                         |
| WP_028604672.1 | glycosyltransferase                                          |
| WP_009671820.1 | DUF4349 domain-containing protein                            |
| WP_050472495.1 | DUF1134 domain-containing protein                            |
| WP_026239184.1 | hypothetical protein                                         |
| WP_022929851.1 | hypothetical protein                                         |
| WP_026912667.1 | DUF1775 domain-containing protein                            |
| WP_058720172.1 | hypothetical protein                                         |
| WP_029915213.1 | hydrogenase 2 operon protein HybA                            |
| WP_057298407.1 | hypothetical protein                                         |
| WP_068455654.1 | G5 domain-containing protein                                 |
| WP_051940138.1 | YcnI family protein                                          |
| WP_019208887.1 | Wzz/FepE/Etk N-terminal domain-containing protein            |
| WP_038677511.1 | hypothetical protein                                         |
| WP_079705109.1 | copper resistance protein CopC                               |
| WP_079001510.1 | copper resistance protein CopC                               |
| WP_085511799.1 | copper resistance protein CopC                               |
| WP_064294246.1 | copper resistance protein CopC                               |
| WP_056779050.1 | copper resistance protein CopC                               |
| WP_056008599.1 | copper resistance protein CopC                               |
| WP_071259775.1 | copper resistance protein CopC                               |



|                |                                                  |
|----------------|--------------------------------------------------|
| WP_086474591.1 | copper resistance protein CopC                   |
| WP_064075989.1 | hypothetical protein                             |
| WP_018362232.1 | hypothetical protein                             |
| WP_084634577.1 | choice-of-anchor M domain-containing protein     |
| WP_019502533.1 | DNA/RNA non-specific endonuclease                |
| WP_058266926.1 | S1 family peptidase                              |
| WP_068478771.1 | Ig-like domain-containing protein                |
| WP_071041290.1 | metallophosphoesterase family protein            |
| WP_077934522.1 | hypothetical protein                             |
| WP_041119189.1 | hypothetical protein                             |
| WP_053152798.1 | hypothetical protein                             |
| WP_060840229.1 | hypothetical protein                             |
| WP_029978019.1 | hypothetical protein                             |
| WP_060844157.1 | hypothetical protein                             |
| WP_037069415.1 | type II secretion system F family protein        |
| WP_013674910.1 | DUF3153 domain-containing protein                |
| WP_028938488.1 | YcnI family protein                              |
| WP_057657592.1 | SURF1 family protein                             |
| WP_019717437.1 | hypothetical protein                             |
| WP_023470008.1 | hypothetical protein                             |
| WP_064051878.1 | ABC transporter permease                         |
| WP_087451541.1 | hypothetical protein                             |
| WP_085477620.1 | DUF6049 family protein                           |
| WP_056039821.1 | DUF6049 family protein                           |
| WP_056867345.1 | DUF4349 domain-containing protein                |
| WP_055794040.1 | hypothetical protein                             |
| WP_077223961.1 | DUF4397 domain-containing protein                |
| WP_068255954.1 | bifunctional UDP-sugar hydrolase/5'-nucleotidase |
| WP_007608427.1 | hypothetical protein                             |
| WP_043292041.1 | hypothetical protein                             |
| WP_015448274.1 | hypothetical protein                             |
| WP_027490105.1 | hypothetical protein                             |
| WP_077554286.1 | DUF2167 domain-containing protein                |
| WP_027484742.1 | hypothetical protein                             |
| WP_056388158.1 | DUF3999 family protein                           |
| WP_003945065.1 | hypothetical protein                             |
| WP_045841254.1 | DUF3153 domain-containing protein                |
| WP_033234426.1 | hypothetical protein                             |
| WP_072687607.1 | hypothetical protein                             |
| WP_006553374.1 | YcnI family protein                              |
| WP_070378241.1 | hypothetical protein                             |
| WP_054163953.1 | DUF1134 domain-containing protein                |
| WP_011504069.1 | DUF1134 domain-containing protein                |
| WP_009814865.1 | hypothetical protein                             |



|                |                                                              |
|----------------|--------------------------------------------------------------|
| WP_049350406.1 | LPXTG cell wall anchor domain-containing protein             |
| WP_049347585.1 | hypothetical protein                                         |
| WP_083090608.1 | twin-arginine translocation signal domain-containing protein |
| WP_070690408.1 | hypothetical protein                                         |
| WP_070688290.1 | hypothetical protein                                         |
| WP_013628474.1 | hypothetical protein                                         |
| WP_047866510.1 | hypothetical protein                                         |
| WP_005441710.1 | hypothetical protein                                         |
| WP_005449049.1 | hypothetical protein                                         |
| WP_085978096.1 | hypothetical protein                                         |
| WP_015097763.1 | HAD-IB family hydrolase                                      |
| WP_077008428.1 | choice-of-anchor P family protein                            |
| WP_073889111.1 | choice-of-anchor P family protein                            |
| WP_033438454.1 | choice-of-anchor P family protein                            |
| WP_052682257.1 | hypothetical protein                                         |
| WP_013061775.1 | Gldg family protein                                          |
| WP_017548268.1 | hypothetical protein                                         |
| WP_024269372.1 | hypothetical protein                                         |
| WP_023226644.1 | hypothetical protein                                         |
| WP_023206755.1 | anti-virulence regulatory inner membrane protein CigR        |
| WP_053234517.1 | hypothetical protein                                         |
| WP_056132372.1 | cohesin domain-containing protein                            |
| WP_051259476.1 | TIGR03773 family transporter-associated surface protein      |
| WP_010585528.1 | hypothetical protein                                         |
| WP_017741353.1 | tetratricopeptide repeat protein                             |
| WP_083653165.1 | hypothetical protein                                         |
| WP_075814310.1 | hypothetical protein                                         |
| WP_061795424.1 | anti-virulence regulator CigR family protein                 |
| WP_061807603.1 | anti-virulence regulator CigR family protein                 |
| WP_063989634.1 | anti-virulence regulator CigR family protein                 |
| WP_087763533.1 | anti-virulence regulator CigR family protein                 |
| WP_004941297.1 | anti-virulence regulator CigR family protein                 |
| WP_060427691.1 | anti-virulence regulator CigR family protein                 |
| WP_060419303.1 | anti-virulence regulator CigR family protein                 |
| WP_060432922.1 | anti-virulence regulator CigR family protein                 |
| WP_060424250.1 | anti-virulence regulator CigR family protein                 |
| WP_055316240.1 | anti-virulence regulator CigR family protein                 |
| WP_086579703.1 | anti-virulence regulator CigR family protein                 |
| WP_079451327.1 | anti-virulence regulator CigR family protein                 |
| WP_055312290.1 | anti-virulence regulator CigR family protein                 |
| WP_061872057.1 | anti-virulence regulator CigR family protein                 |
| WP_082997693.1 | anti-virulence regulator CigR family protein                 |
| WP_077039006.1 | anti-virulence regulator CigR family protein                 |
| WP_074307161.1 | hypothetical protein                                         |



|                |                                                    |
|----------------|----------------------------------------------------|
| WP_012237712.1 | hypothetical protein                               |
| WP_049949682.1 | hypothetical protein                               |
| WP_037451034.1 | TIGR02186 family protein                           |
| WP_013846095.1 | TIGR02186 family protein                           |
| WP_046763191.1 | TIGR02186 family protein                           |
| WP_066606327.1 | DUF2585 domain-containing protein                  |
| WP_025550228.1 | TIGR02186 family protein                           |
| WP_007684696.1 | TIGR02186 family protein                           |
| WP_013039593.1 | TIGR02186 family protein                           |
| WP_061939000.1 | TIGR02186 family protein                           |
| WP_030541714.1 | DUF2585 domain-containing protein                  |
| WP_056427251.1 | flagellar basal-body MS-ring/collar protein FliF   |
| WP_037541996.1 | DUF2585 domain-containing protein                  |
| WP_077132096.1 | hypothetical protein                               |
| WP_046574408.1 | hypothetical protein                               |
| WP_019873836.1 | hypothetical protein                               |
| WP_005412559.1 | gluconate 2-dehydrogenase subunit 3 family protein |
| WP_005415638.1 | gluconate 2-dehydrogenase subunit 3 family protein |
| WP_061480680.1 | DUF4349 domain-containing protein                  |
| WP_065186376.1 | DUF4349 domain-containing protein                  |
| WP_005415830.1 | DUF4349 domain-containing protein                  |
| WP_088496929.1 | DUF4349 domain-containing protein                  |
| WP_065177445.1 | DUF4349 domain-containing protein                  |
| WP_053497069.1 | DUF4349 domain-containing protein                  |
| WP_034087229.1 | S8 family serine peptidase                         |
| WP_042405542.1 | chaplin                                            |
| WP_030256123.1 | chaplin                                            |
| WP_037602190.1 | LPXTG cell wall anchor domain-containing protein   |
| WP_048791748.1 | hypothetical protein                               |
| WP_045496817.1 | hypothetical protein                               |
| WP_005592214.1 | hypothetical protein                               |
| WP_061423038.1 | hypothetical protein                               |
| WP_061910244.1 | hypothetical protein                               |
| WP_015604698.1 | hypothetical protein                               |
| WP_037580257.1 | LPXTG cell wall anchor domain-containing protein   |
| WP_040269875.1 | copper resistance protein CopC                     |
| WP_070013327.1 | SCO1860 family LAETG-anchored protein              |
| WP_070011590.1 | hypothetical protein                               |
| WP_010355677.1 | hypothetical protein                               |
| WP_050371013.1 | hypothetical protein                               |
| WP_010356313.1 | alginate lyase family protein                      |
| WP_086565734.1 | DUF4349 domain-containing protein                  |
| WP_015507753.1 | hypothetical protein                               |
| WP_030307403.1 | DUF4349 domain-containing protein                  |



|                |                                                              |
|----------------|--------------------------------------------------------------|
| WP_061404434.1 | hypothetical protein                                         |
| WP_010638641.1 | hypothetical protein                                         |
| WP_085478814.1 | hypothetical protein                                         |
| WP_030309758.1 | hypothetical protein                                         |
| WP_049978979.1 | DUF4349 domain-containing protein                            |
| WP_049977564.1 | HtaA domain-containing protein                               |
| WP_030304860.1 | hypothetical protein                                         |
| WP_033237593.1 | hypothetical protein                                         |
| WP_030698069.1 | hypothetical protein                                         |
| WP_037843057.1 | hypothetical protein                                         |
| WP_071338394.1 | DUF4349 domain-containing protein                            |
| WP_061405035.1 | HtaA domain-containing protein                               |
| WP_047471185.1 | hypothetical protein                                         |
| WP_087928343.1 | HtaA domain-containing protein                               |
| WP_030803089.1 | hypothetical protein                                         |
| WP_040251858.1 | DUF3068 domain-containing protein                            |
| WP_016468754.1 | prenyltransferase/squalene oxidase repeat-containing protein |
| WP_055498263.1 | prenyltransferase/squalene oxidase repeat-containing protein |
| WP_032776788.1 | hypothetical protein                                         |
| WP_037611286.1 | prenyltransferase/squalene oxidase repeat-containing protein |
| WP_030631798.1 | DUF4349 domain-containing protein                            |
| WP_030603830.1 | hypothetical protein                                         |
| WP_037680772.1 | DUF1996 domain-containing protein                            |
| WP_053141924.1 | hypothetical protein                                         |
| WP_060176777.1 | hypothetical protein                                         |
| WP_086719786.1 | hypothetical protein                                         |
| WP_059191885.1 | hypothetical protein                                         |
| WP_030645059.1 | DUF4349 domain-containing protein                            |
| WP_055508106.1 | terpene cyclase/mutase family protein                        |
| WP_040899100.1 | hypothetical protein                                         |
| WP_030565856.1 | hypothetical protein                                         |
| WP_037623895.1 | HtaA domain-containing protein                               |
| WP_078234756.1 | DUF1996 domain-containing protein                            |
| WP_052851228.1 | DUF4349 domain-containing protein                            |
| WP_014152884.1 | hypothetical protein                                         |
| WP_030079189.1 | LAETG motif-containing sortase-dependent surface protein     |
| WP_014180138.1 | SCO2322 family protein                                       |
| WP_030113438.1 | hypothetical protein                                         |
| WP_086763368.1 | hypothetical protein                                         |
| WP_030189408.1 | hypothetical protein                                         |
| WP_059205742.1 | SCO2322 family protein                                       |
| WP_062042357.1 | SCO2322 family protein                                       |
| WP_030180617.1 | hypothetical protein                                         |
| WP_029181655.1 | hypothetical protein                                         |



|                |                                                          |
|----------------|----------------------------------------------------------|
| WP_053925821.1 | S8 family serine peptidase                               |
| WP_059263647.1 | hypothetical protein                                     |
| WP_062143793.1 | DUF2330 domain-containing protein                        |
| WP_044384405.1 | LAETG motif-containing sortase-dependent surface protein |
| WP_015659944.1 | hypothetical protein                                     |
| WP_053209708.1 | hypothetical protein                                     |
| WP_031148216.1 | hypothetical protein                                     |
| WP_006124616.1 | hypothetical protein                                     |
| WP_010070991.1 | hypothetical protein                                     |
| WP_030637428.1 | hypothetical protein                                     |
| WP_031129975.1 | hypothetical protein                                     |
| WP_043464200.1 | DUF1996 domain-containing protein                        |
| WP_030601925.1 | HtaA domain-containing protein                           |
| WP_079040852.1 | VWA domain-containing protein                            |
| WP_083107039.1 | hypothetical protein                                     |
| WP_010059884.1 | hypothetical protein                                     |
| WP_030689701.1 | hypothetical protein                                     |
| WP_030592787.1 | DUF4349 domain-containing protein                        |
| WP_078489131.1 | DUF6049 family protein                                   |
| WP_079196203.1 | DUF6049 family protein                                   |
| WP_069169392.1 | DUF4349 domain-containing protein                        |
| WP_030754832.1 | hypothetical protein                                     |
| WP_030847770.1 | hypothetical protein                                     |
| WP_030710305.1 | hypothetical protein                                     |
| WP_030733765.1 | hypothetical protein                                     |
| WP_055631020.1 | HtaA domain-containing protein                           |
| WP_051814695.1 | copper resistance protein CopC                           |
| WP_067285055.1 | hypothetical protein                                     |
| WP_055548827.1 | hypothetical protein                                     |
| WP_030295329.1 | hypothetical protein                                     |
| WP_079429764.1 | hypothetical protein                                     |
| WP_073951852.1 | HtaA domain-containing protein                           |
| WP_030238604.1 | HtaA domain-containing protein                           |
| WP_030225214.1 | DUF6049 family protein                                   |
| WP_030660217.1 | hypothetical protein                                     |
| WP_029385521.1 | LAETG motif-containing sortase-dependent surface protein |
| WP_048572334.1 | LAETG motif-containing sortase-dependent surface protein |
| WP_016325237.1 | S1 family peptidase                                      |
| WP_079021358.1 | DUF1996 domain-containing protein                        |
| WP_069885441.1 | hypothetical protein                                     |
| WP_042156490.1 | hypothetical protein                                     |
| WP_051732961.1 | VWA domain-containing protein                            |
| WP_077192932.1 | VWA domain-containing protein                            |
| WP_033266588.1 | hypothetical protein                                     |



|                |                                                              |
|----------------|--------------------------------------------------------------|
| WP_046584143.1 | DUF4331 domain-containing protein                            |
| WP_030812892.1 | hypothetical protein                                         |
| WP_004943253.1 | SCO1860 family LAETG-anchored protein                        |
| WP_031100002.1 | hypothetical protein                                         |
| WP_070014799.1 | SCO1860 family LAETG-anchored protein                        |
| WP_055541462.1 | hypothetical protein                                         |
| WP_052863743.1 | hypothetical protein                                         |
| WP_078076280.1 | YcnI family protein                                          |
| WP_064073155.1 | SCO1860 family LAETG-anchored protein                        |
| WP_037635128.1 | hypothetical protein                                         |
| WP_038519829.1 | hypothetical protein                                         |
| WP_079023587.1 | hypothetical protein                                         |
| WP_078892164.1 | DUF1996 domain-containing protein                            |
| WP_078535903.1 | DUF1996 domain-containing protein                            |
| WP_079155135.1 | DUF1996 domain-containing protein                            |
| WP_067363291.1 | HtaA domain-containing protein                               |
| WP_055522229.1 | hypothetical protein                                         |
| WP_032915072.1 | hypothetical protein                                         |
| WP_055612260.1 | HtaA domain-containing protein                               |
| WP_073499707.1 | DUF1775 domain-containing protein                            |
| WP_085927641.1 | hypothetical protein                                         |
| WP_085926357.1 | hypothetical protein                                         |
| WP_055573436.1 | SCO1860 family LAETG-anchored protein                        |
| WP_055694013.1 | SCO1860 family LAETG-anchored protein                        |
| WP_055606274.1 | SCO1860 family LAETG-anchored protein                        |
| WP_055688174.1 | SCO1860 family LAETG-anchored protein                        |
| WP_031060443.1 | SCO2322 family protein                                       |
| WP_074998544.1 | prenyltransferase/squalene oxidase repeat-containing protein |
| WP_069991284.1 | prenyltransferase/squalene oxidase repeat-containing protein |
| WP_053800621.1 | hypothetical protein                                         |
| WP_030603358.1 | hypothetical protein                                         |
| WP_030672730.1 | hypothetical protein                                         |
| WP_033026720.1 | hypothetical protein                                         |
| WP_030634038.1 | hypothetical protein                                         |
| WP_030651718.1 | hypothetical protein                                         |
| WP_051430100.1 | hypothetical protein                                         |
| WP_067416561.1 | DUF4349 domain-containing protein                            |
| WP_037703295.1 | TULIP family P47-like protein                                |
| WP_030351526.1 | hypothetical protein                                         |
| WP_058848772.1 | hypothetical protein                                         |
| WP_052489045.1 | hypothetical protein                                         |
| WP_020129099.1 | DUF1775 domain-containing protein                            |
| WP_079406108.1 | hypothetical protein                                         |
| WP_033947955.1 | hypothetical protein                                         |



|                |                                                              |
|----------------|--------------------------------------------------------------|
| WP_078875879.1 | hypothetical protein                                         |
| WP_019433298.1 | S8 family serine peptidase                                   |
| WP_019357822.1 | prenyltransferase/squalene oxidase repeat-containing protein |
| WP_023419047.1 | hypothetical protein                                         |
| WP_018552017.1 | TIGR03773 family transporter-associated surface protein      |
| WP_019983617.1 | alkaline phosphatase family protein                          |
| WP_033240369.1 | hypothetical protein                                         |
| WP_073918172.1 | hypothetical protein                                         |
| WP_073781669.1 | hypothetical protein                                         |
| WP_073738813.1 | hypothetical protein                                         |
| WP_073758166.1 | hypothetical protein                                         |
| WP_073752756.1 | SCO1860 family LAETG-anchored protein                        |
| WP_087776164.1 | HtaA domain-containing protein                               |
| WP_043265717.1 | hypothetical protein                                         |
| WP_058925582.1 | SCO2322 family protein                                       |
| WP_061403993.1 | DUF4349 domain-containing protein                            |
| WP_067159911.1 | hypothetical protein                                         |
| WP_067392033.1 | HtaA domain-containing protein                               |
| WP_075987369.1 | HtaA domain-containing protein                               |
| WP_067052849.1 | DUF4331 domain-containing protein                            |
| WP_018089851.1 | hypothetical protein                                         |
| WP_075986595.1 | hypothetical protein                                         |
| WP_065002969.1 | SCO1860 family LAETG-anchored protein                        |
| WP_053629362.1 | hypothetical protein                                         |
| WP_053677522.1 | hypothetical protein                                         |
| WP_060178439.1 | LPXTG cell wall anchor domain-containing protein             |
| WP_076089841.1 | hypothetical protein                                         |
| WP_053611851.1 | hypothetical protein                                         |
| WP_032773289.1 | hypothetical protein                                         |
| WP_047138782.1 | hypothetical protein                                         |
| WP_069759320.1 | SCO2322 family protein                                       |
| WP_018546292.1 | HtaA domain-containing protein                               |
| WP_018468438.1 | hypothetical protein                                         |
| WP_076972671.1 | DUF1996 domain-containing protein                            |
| WP_030991215.1 | DUF4349 domain-containing protein                            |
| WP_073773078.1 | hypothetical protein                                         |
| WP_063348001.1 | hypothetical protein                                         |
| WP_030834094.1 | hypothetical protein                                         |
| WP_084771524.1 | hypothetical protein                                         |
| WP_079176493.1 | DUF1996 domain-containing protein                            |
| WP_047960688.1 | hypothetical protein                                         |
| WP_062204714.1 | choice-of-anchor M domain-containing protein                 |
| WP_078890523.1 | porin PorA family protein                                    |
| WP_066926162.1 | hypothetical protein                                         |



|                |                                                              |
|----------------|--------------------------------------------------------------|
| WP_071338956.1 | HtaA domain-containing protein                               |
| WP_030679056.1 | HtaA domain-containing protein                               |
| WP_030879423.1 | hypothetical protein                                         |
| WP_053849849.1 | SCO2322 family protein                                       |
| WP_030722950.1 | SCO2322 family protein                                       |
| WP_030768766.1 | hypothetical protein                                         |
| WP_030857734.1 | DUF6049 family protein                                       |
| WP_046722871.1 | DUF2330 domain-containing protein                            |
| WP_030853527.1 | hypothetical protein                                         |
| WP_066980116.1 | hypothetical protein                                         |
| WP_078855939.1 | DUF1996 domain-containing protein                            |
| WP_059130410.1 | LAETG motif-containing sortase-dependent surface protein     |
| WP_031517753.1 | terpene cyclase/mutase family protein                        |
| WP_043232110.1 | hypothetical protein                                         |
| WP_031028222.1 | prenyltransferase/squalene oxidase repeat-containing protein |
| WP_031052890.1 | hypothetical protein                                         |
| WP_053696604.1 | hypothetical protein                                         |
| WP_030406608.1 | prenyltransferase/squalene oxidase repeat-containing protein |
| WP_053642605.1 | LAETG motif-containing sortase-dependent surface protein     |
| WP_030771374.1 | hypothetical protein                                         |
| WP_078865984.1 | VWA domain-containing protein                                |
| WP_037839904.1 | hypothetical protein                                         |
| WP_078852820.1 | SCO1860 family LAETG-anchored protein                        |
| WP_031095397.1 | DUF4349 domain-containing protein                            |
| WP_030721008.1 | hypothetical protein                                         |
| WP_030386983.1 | hypothetical protein                                         |
| WP_030153186.1 | DUF6049 family protein                                       |
| WP_030231344.1 | LPXTG cell wall anchor domain-containing protein             |
| WP_030964283.1 | hypothetical protein                                         |
| WP_030771538.1 | hypothetical protein                                         |
| WP_030939315.1 | hypothetical protein                                         |
| WP_051795396.1 | hypothetical protein                                         |
| WP_030791129.1 | SCO1860 family LAETG-anchored protein                        |
| WP_031023561.1 | DUF4349 domain-containing protein                            |
| WP_037927858.1 | hypothetical protein                                         |
| WP_088577171.1 | hypothetical protein                                         |
| WP_018570515.1 | HtaA domain-containing protein                               |
| WP_073775700.1 | hypothetical protein                                         |
| WP_057601763.1 | hypothetical protein                                         |
| WP_057611173.1 | DUF4349 domain-containing protein                            |
| WP_084993274.1 | hypothetical protein                                         |
| WP_064534583.1 | hypothetical protein                                         |
| WP_023608351.1 | hypothetical protein                                         |
| WP_006345762.1 | DUF1775 domain-containing protein                            |



|                |                                                                   |
|----------------|-------------------------------------------------------------------|
| WP_018509850.1 | LPXTG cell wall anchor domain-containing protein                  |
| WP_081522449.1 | hypothetical protein                                              |
| WP_028416940.1 | hypothetical protein                                              |
| WP_055490993.1 | DUF1996 domain-containing protein                                 |
| WP_078962511.1 | DUF1996 domain-containing protein                                 |
| WP_073938500.1 | hypothetical protein                                              |
| WP_073718266.1 | hypothetical protein                                              |
| WP_037893396.1 | HtaA domain-containing protein                                    |
| WP_075265106.1 | hypothetical protein                                              |
| WP_053676489.1 | hypothetical protein                                              |
| WP_053169188.1 | hypothetical protein                                              |
| WP_053689381.1 | hypothetical protein                                              |
| WP_046259605.1 | LPXTG cell wall anchor domain-containing protein                  |
| WP_053784674.1 | hypothetical protein                                              |
| WP_078095079.1 | hypothetical protein                                              |
| WP_065963662.1 | hypothetical protein                                              |
| WP_059006136.1 | hypothetical protein                                              |
| WP_069921941.1 | hypothetical protein                                              |
| WP_055717924.1 | hypothetical protein                                              |
| WP_006349525.1 | terpene cyclase/mutase family protein                             |
| WP_043247767.1 | hypothetical protein                                              |
| WP_078606519.1 | DUF1996 domain-containing protein                                 |
| WP_078600540.1 | YcnI family protein                                               |
| WP_033218789.1 | hypothetical protein                                              |
| WP_049978038.1 | hypothetical protein                                              |
| WP_031150581.1 | hypothetical protein                                              |
| WP_020372371.1 | hypothetical protein                                              |
| WP_046776149.1 | hypothetical protein                                              |
| WP_033325580.1 | HtaA domain-containing protein                                    |
| WP_003298078.1 | hypothetical protein                                              |
| WP_007047833.1 | hypothetical protein                                              |
| WP_087488285.1 | sugar dehydrogenase complex small subunit                         |
| WP_038020607.1 | sugar dehydrogenase complex small subunit                         |
| WP_020143569.1 | tryptophan-rich sensory protein                                   |
| WP_077686904.1 | SpaA isopeptide-forming pilin-related protein                     |
| WP_083665280.1 | hypothetical protein                                              |
| WP_053334878.1 | 4Fe-4S dicluster domain-containing protein                        |
| WP_011293161.1 | hypothetical protein                                              |
| WP_075279362.1 | glycoside hydrolase family 3 protein                              |
| WP_015258557.1 | ethylbenzene dehydrogenase-related protein                        |
| WP_007194980.1 | hypothetical protein                                              |
| WP_041066896.1 | hypothetical protein                                              |
| WP_059052747.1 | glycoside hydrolase family 3 C-terminal domain-containing protein |



|                |                                                                 |
|----------------|-----------------------------------------------------------------|
| WP_080999149.1 | leucine-rich repeat domain-containing protein                   |
| WP_080712419.1 | leucine-rich repeat domain-containing protein                   |
| WP_080689132.1 | leucine-rich repeat domain-containing protein                   |
| WP_080754043.1 | leucine-rich repeat domain-containing protein                   |
| WP_068566570.1 | DUF4349 domain-containing protein                               |
| WP_068532605.1 | DUF4349 domain-containing protein                               |
|                | cellulose biosynthesis cyclic di-GMP-binding regulatory protein |
| WP_081857365.1 | BcsB                                                            |
| WP_052706166.1 | hypothetical protein                                            |
| WP_055789914.1 | DUF3153 domain-containing protein                               |
| WP_038217501.1 | SURF1 family protein                                            |
| WP_051684734.1 | type II secretion system F family protein                       |
| WP_030124501.1 | hypothetical protein                                            |
| WP_009319933.1 | choice-of-anchor I family protein                               |
| WP_009243371.1 | choice-of-anchor I family protein                               |
| WP_019617431.1 | cytochrome c                                                    |
